# Supplementary material for: Pirated Siderophores Promote Sporulation in Bacillus subtilis
Source: PubMed Central journal article supplement (PMC5411514; doi:10.1128/aem.03293-16), 2017-05-01
Supplement: AEM.03293-16_zam999117827s1.pdf [file AEM.03293-16_zam999117827s1.pdf]

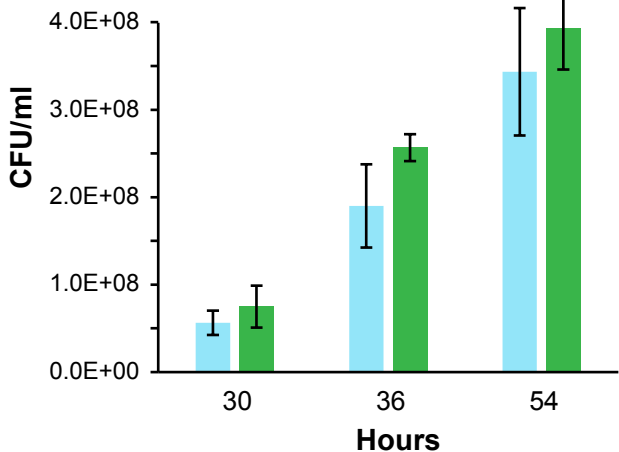

FIG S1

Enterobactin does not affect growth of *B. subtilis*. The total CFU/ml calculated for *B. subtilis* cells treated with 10 μM enterobactin (green) or solvent (blue) at 30, 36, and 54 hours. Samples were taken from microcolony agar assay plates grown in the presence or absence of enterobactin and non-heat treated cells were plated to determine total number of cells. No significant differences were observed between samples treated with enterobactin compared to untreated samples (n=3). Error bars represent standard deviations.

**WT**

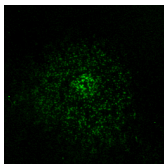

***kinB***

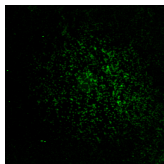

**FIG S2**

Sporulation gene promotion by enterobactin is independent of KinB. Representative fluorescence images of wild-type and *kinB* *B. subtilis*  $P_{sspB}$ -*yfp* micro-colony lawns on agar plates with wells containing 10  $\mu$ M enterobactin. Sporulation gene promotion is observed in both wild-type and the *kinB* mutant.

Table S1

Summary of results from the Keio Collection screen. Each mutant within the collection was spotted onto *B. subtilis* PsspB-yfp microcolony lawns and imaged for fluorescence. Sporulation gene stimulation for each mutant was then noted as either no, low, high, or normal promotion. The table lists all mutants that altered sporulation gene expression compared to wildtype and the corresponding GO terms for each gene where applicable (GO term designations obtained from EcoCyc (Gehring AM, Bradley KA, Walsh CT, *Biochemistry*, 36:8495–503, 1997).

| Plate/Well | No induction | Low induction | High induction | Gene        | GO terms (biological processes)                                                                                                                                                                                                                                                                                                                                                                                                                        |
|------------|--------------|---------------|----------------|-------------|--------------------------------------------------------------------------------------------------------------------------------------------------------------------------------------------------------------------------------------------------------------------------------------------------------------------------------------------------------------------------------------------------------------------------------------------------------|
| P1 A2      |              | x             |                | <i>bgfG</i> | GO:0045893 - positive regulation of transcription, DNA-templated<br>GO:0006355 - regulation of transcription, DNA-templated<br>GO:0006351 - transcription, DNA-templated                                                                                                                                                                                                                                                                               |
| P1 A9      |              | x             |                | <i>tyrR</i> | GO:0008152 - metabolic process<br>GO:0006351 - transcription, DNA-templated<br>GO:0045892 - negative regulation of transcription, DNA-templated<br>GO:0019439 - aromatic compound catabolic process<br>GO:0006355 - regulation of transcription, DNA-templated<br>GO:0000160 - phosphorelay signal transduction system                                                                                                                                 |
| P1 A10     |              | x             |                | <i>rscC</i> | GO:0023014 - signal transduction by protein phosphorylation<br>GO:0018106 - peptidyl-histidine phosphorylation<br>GO:0016310 - phosphorylation<br>GO:0007165 - signal transduction<br>GO:0006355 - regulation of transcription, DNA-templated<br>GO:0046777 - protein autophosphorylation<br>GO:0044010 - single-species biofilm formation<br>GO:0071470 - cellular response to osmotic stress<br>GO:0000160 - phosphorelay signal transduction system |
| P1 A11     |              | x             |                | <i>aceF</i> | GO:0055114 - oxidation-reduction process<br>GO:0008152 - metabolic process<br>GO:0006090 - pyruvate metabolic process<br>GO:0006086 - acetyl-CoA biosynthetic process from pyruvate<br>GO:0006096 - glycolytic process                                                                                                                                                                                                                                 |
| P1 B2      |              | x             |                | <i>btuR</i> | GO:0006779 - porphyrin-containing compound biosynthetic process<br>GO:0019250 - aerobic cobalamin biosynthetic process<br>GO:0009236 - cobalamin biosynthetic process                                                                                                                                                                                                                                                                                  |
| P1 B9      |              |               | x              | <i>uidR</i> | GO:0045892 - negative regulation of transcription, DNA-templated<br>GO:0006355 - regulation of transcription, DNA-templated<br>GO:0006351 - transcription, DNA-templated                                                                                                                                                                                                                                                                               |
| P1 C6      |              | x             |                | <i>melR</i> | GO:0006351 - transcription, DNA-templated<br>GO:0006355 - regulation of transcription, DNA-templated                                                                                                                                                                                                                                                                                                                                                   |
| P1 C7      |              | x             |                | <i>nhaR</i> | GO:0006351 - transcription, DNA-templated<br>GO:0006355 - regulation of transcription, DNA-templated                                                                                                                                                                                                                                                                                                                                                   |
| P1 C8      |              | x             |                | <i>soxR</i> | GO:0006355 - regulation of transcription, DNA-templated<br>GO:0006979 - response to oxidative stress<br>GO:0006351 - transcription, DNA-templated                                                                                                                                                                                                                                                                                                      |
| P1 C9      |              | x             |                | <i>uxuR</i> | GO:0006355 - regulation of transcription, DNA-templated<br>GO:0006351 - transcription, DNA-templated                                                                                                                                                                                                                                                                                                                                                   |
| P1 D4      | x            |               |                | <i>galS</i> | GO:0006351 - transcription, DNA-templated<br>GO:0006355 - regulation of transcription, DNA-templated                                                                                                                                                                                                                                                                                                                                                   |
| P1 E1      | x            |               |                | <i>appY</i> | GO:0006355 - regulation of transcription, DNA-templated<br>GO:0006351 - transcription, DNA-templated<br>GO:0016036 - cellular response to phosphate starvation<br>GO:0045893 - positive regulation of transcription, DNA-templated                                                                                                                                                                                                                     |
| P1 E2      | x            |               |                | <i>chbR</i> | GO:0006355 - regulation of transcription, DNA-templated<br>GO:0006351 - transcription, DNA-templated<br>GO:0045892 - negative regulation of transcription, DNA-templated                                                                                                                                                                                                                                                                               |
| P1 E5      |              | x             |                | <i>leuO</i> | GO:0006351 - transcription, DNA-templated<br>GO:0006355 - regulation of transcription, DNA-templated                                                                                                                                                                                                                                                                                                                                                   |
| P1 E6      | x            |               |                | <i>metR</i> | GO:0006351 - transcription, DNA-templated<br>GO:0008652 - cellular amino acid biosynthetic process<br>GO:0006355 - regulation of transcription, DNA-templated<br>GO:0009086 - methionine biosynthetic process                                                                                                                                                                                                                                          |
| P1 E9      |              | x             |                | <i>zntR</i> | GO:0006355 - regulation of transcription, DNA-templated<br>GO:0006351 - transcription, DNA-templated<br>GO:0045893 - positive regulation of transcription, DNA-templated                                                                                                                                                                                                                                                                               |
| P1 E10     |              | x             |                | <i>rbsR</i> | GO:0045893 - positive regulation of transcription, DNA-templated<br>GO:0006355 - regulation of transcription, DNA-templated<br>GO:0006351 - transcription, DNA-templated                                                                                                                                                                                                                                                                               |

|        |   |   |   |             |                                                                                                                                                                                                                                                                                                                                                                                                                                                                                                          |
|--------|---|---|---|-------------|----------------------------------------------------------------------------------------------------------------------------------------------------------------------------------------------------------------------------------------------------------------------------------------------------------------------------------------------------------------------------------------------------------------------------------------------------------------------------------------------------------|
| P1 F1  |   | x |   | <i>argR</i> | GO:0006355 - regulation of transcription, DNA-templated<br>GO:0006351 - transcription, DNA-templated<br>GO:0006310 - DNA recombination<br>GO:0051259 - protein oligomerization<br>GO:0006525 - arginine metabolic process<br>GO:2000143 - negative regulation of DNA-templated transcription, initiation<br>GO:0042150 - plasmid recombination<br>GO:0008652 - cellular amino acid biosynthetic process<br>GO:0006526 - arginine biosynthetic process                                                    |
| P1 F3  |   | x |   | <i>envY</i> | GO:0009266 - response to temperature stimulus<br>GO:0006355 - regulation of transcription, DNA-templated<br>GO:0006351 - transcription, DNA-templated                                                                                                                                                                                                                                                                                                                                                    |
| P1 F6  |   | x |   | <i>mhpR</i> | GO:0045892 - negative regulation of transcription, DNA-templated<br>GO:0006355 - regulation of transcription, DNA-templated<br>GO:0019439 - aromatic compound catabolic process<br>GO:0006351 - transcription, DNA-templated                                                                                                                                                                                                                                                                             |
| P1 F10 |   | x |   | <i>sdiA</i> | GO:0051301 - cell division<br>GO:0006355 - regulation of transcription, DNA-templated<br>GO:0006351 - transcription, DNA-templated<br>GO:0032467 - positive regulation of cytokinesis<br>GO:2000144 - positive regulation of DNA-templated transcription, initiation<br>GO:0007049 - cell cycle                                                                                                                                                                                                          |
| P1 F11 | x |   |   | <i>cyoB</i> | GO:0055114 - oxidation-reduction process<br>GO:0015992 - proton transport<br>GO:0009060 - aerobic respiration<br>GO:0006811 - ion transport<br>GO:0015990 - electron transport coupled proton transport<br>GO:0019646 - aerobic electron transport chain                                                                                                                                                                                                                                                 |
| P1 F12 | x |   |   | <i>sucB</i> | GO:0008152 - metabolic process<br>GO:0033512 - L-lysine catabolic process to acetyl-CoA via saccharopine<br>GO:0006099 - tricarboxylic acid cycle                                                                                                                                                                                                                                                                                                                                                        |
| P1 G1  |   | x |   | <i>asnC</i> | GO:0006355 - regulation of transcription, DNA-templated<br>GO:0006351 - transcription, DNA-templated<br>GO:0045893 - positive regulation of transcription, DNA-templated<br>GO:0045892 - negative regulation of transcription, DNA-templated<br>GO:0043200 - response to amino acid                                                                                                                                                                                                                      |
| P1 G2  |   | x |   | <i>csgD</i> | GO:0006355 - regulation of transcription, DNA-templated<br>GO:0006351 - transcription, DNA-templated<br>GO:1900190 - regulation of single-species biofilm formation<br>GO:2000144 - positive regulation of DNA-templated transcription, initiation                                                                                                                                                                                                                                                       |
| P1 G3  |   | x |   | <i>fadR</i> | GO:0045723 - positive regulation of fatty acid biosynthetic process<br>GO:0006631 - fatty acid metabolic process<br>GO:0006629 - lipid metabolic process<br>GO:0019217 - regulation of fatty acid metabolic process<br>GO:0019395 - fatty acid oxidation<br>GO:0045892 - negative regulation of transcription, DNA-templated<br>GO:0045893 - positive regulation of transcription, DNA-templated<br>GO:0006355 - regulation of transcription, DNA-templated<br>GO:0006351 - transcription, DNA-templated |
| P1 G10 |   |   | x | <i>srlR</i> | GO:0006355 - regulation of transcription, DNA-templated<br>GO:0006351 - transcription, DNA-templated<br>GO:0045892 - negative regulation of transcription, DNA-templated<br>GO:0009401 - phosphoenolpyruvate-dependent sugar phosphotransferase system                                                                                                                                                                                                                                                   |
| P1 H1  | x |   |   | <i>betI</i> | GO:0006355 - regulation of transcription, DNA-templated<br>GO:0006351 - transcription, DNA-templated<br>GO:0019285 - glycine betaine biosynthetic process from choline<br>GO:0045892 - negative regulation of transcription, DNA-templated<br>GO:0006970 - response to osmotic stress                                                                                                                                                                                                                    |
| P1 H2  |   | x |   | <i>cynR</i> | GO:0006355 - regulation of transcription, DNA-templated<br>GO:0006351 - transcription, DNA-templated                                                                                                                                                                                                                                                                                                                                                                                                     |
| P1 H3  |   | x |   | <i>fis</i>  | GO:0006351 - transcription, DNA-templated<br>GO:0034401 - chromatin organization involved in regulation of transcription<br>GO:0006355 - regulation of transcription, DNA-templated                                                                                                                                                                                                                                                                                                                      |
| P1 H4  | x |   |   | <i>hupA</i> | GO:0030261 - chromosome condensation<br>GO:0006974 - cellular response to DNA damage stimulus<br>GO:0006351 - transcription, DNA-templated                                                                                                                                                                                                                                                                                                                                                               |
| P1 H5  |   | x |   | <i>mall</i> | GO:0006355 - regulation of transcription, DNA-templated<br>GO:0006351 - transcription, DNA-templated<br>GO:0045892 - negative regulation of transcription, DNA-templated                                                                                                                                                                                                                                                                                                                                 |

|        |   |   |   |             |                                                                                                                                                                                                                                                                                                                                                                           |
|--------|---|---|---|-------------|---------------------------------------------------------------------------------------------------------------------------------------------------------------------------------------------------------------------------------------------------------------------------------------------------------------------------------------------------------------------------|
| P1 H8  |   | x |   | <i>trpR</i> | GO:0006351 - transcription, DNA-templated<br>GO:0045892 - negative regulation of transcription, DNA-templated<br>GO:0006355 - regulation of transcription, DNA-templated                                                                                                                                                                                                  |
| P3 A2  |   |   | x | <i>adhE</i> | GO:0008152 - metabolic process<br>GO:0006066 - alcohol metabolic process<br>GO:0015976 - carbon utilization<br>GO:0006115 - ethanol biosynthetic process<br>GO:0055114 - oxidation-reduction process                                                                                                                                                                      |
| P3 A6  |   | x |   | <i>mdh</i>  | GO:0019752 - carboxylic acid metabolic process<br>GO:0055114 - oxidation-reduction process<br>GO:0005975 - carbohydrate metabolic process<br>GO:0006108 - malate metabolic process<br>GO:0006096 - glycolytic process<br>GO:0006099 - tricarboxylic acid cycle<br>GO:0009061 - anaerobic respiration<br>GO:0006113 - fermentation                                         |
| P3 B4  |   | x |   | <i>nuoK</i> | GO:0055114 - oxidation-reduction process<br>GO:0042773 - ATP synthesis coupled electron transport<br>GO:0006810 - transport                                                                                                                                                                                                                                               |
| P3 B5  |   | x |   | <i>nuoA</i> | GO:0055114 - oxidation-reduction process<br>GO:0006810 - transport                                                                                                                                                                                                                                                                                                        |
| P3 B6  |   |   | x | <i>yhfW</i> | GO:0043094 - cellular metabolic compound salvage<br>GO:0009117 - nucleotide metabolic process<br>GO:0008152 - metabolic process                                                                                                                                                                                                                                           |
| P3 B8  | x |   |   | <i>frdC</i> | GO:0044780 - bacterial-type flagellum assembly<br>GO:0001539 - cilium or flagellum-dependent cell motility<br>GO:0006810 - transport<br>GO:0009061 - anaerobic respiration<br>GO:0006113 - fermentation                                                                                                                                                                   |
| P3 B12 |   | x |   | <i>atoC</i> | GO:0010967 - regulation of polyamine biosynthetic process<br>GO:0043086 - negative regulation of catalytic activity<br>GO:0006355 - regulation of transcription, DNA-templated<br>GO:0006351 - transcription, DNA-templated<br>GO:0045893 - positive regulation of transcription, DNA-templated<br>GO:0000160 - phosphorelay signal transduction system                   |
| P3 C4  |   | x |   | <i>nuoJ</i> | GO:0055114 - oxidation-reduction process                                                                                                                                                                                                                                                                                                                                  |
| P3 C9  |   |   | x | <i>citB</i> | GO:0009605 - response to external stimulus<br>GO:0006355 - regulation of transcription, DNA-templated<br>GO:0000160 - phosphorelay signal transduction system<br>GO:0006351 - transcription, DNA-templated                                                                                                                                                                |
| P3 C11 |   |   | x | <i>uvrY</i> | GO:0006355 - regulation of transcription, DNA-templated<br>GO:0006351 - transcription, DNA-templated<br>GO:0000160 - phosphorelay signal transduction system                                                                                                                                                                                                              |
| P3 D7  |   | x |   | <i>aceB</i> | GO:0006099 - tricarboxylic acid cycle<br>GO:0006097 - glyoxylate cycle                                                                                                                                                                                                                                                                                                    |
| P3 E5  | x |   |   | <i>talA</i> | GO:0005975 - carbohydrate metabolic process<br>GO:0006098 - pentose-phosphate shunt                                                                                                                                                                                                                                                                                       |
| P3 E6  |   | x |   | <i>gpml</i> | GO:0006979 - response to oxidative stress<br>GO:0008152 - metabolic process<br>GO:0006007 - glucose catabolic process<br>GO:0006096 - glycolytic process                                                                                                                                                                                                                  |
| P3 E7  |   | x |   | <i>aceA</i> | GO:0019752 - carboxylic acid metabolic process<br>GO:0008152 - metabolic process<br>GO:0006099 - tricarboxylic acid cycle<br>GO:0006097 - glyoxylate cycle                                                                                                                                                                                                                |
| P3 E8  |   | x |   | <i>deoB</i> | GO:0009166 - nucleotide catabolic process<br>GO:0009264 - deoxyribonucleotide catabolic process<br>GO:0043094 - cellular metabolic compound salvage<br>GO:0009117 - nucleotide metabolic process<br>GO:0008152 - metabolic process<br>GO:0006974 - cellular response to DNA damage stimulus<br>GO:0006015 - 5-phosphoribose 1-diphosphate biosynthetic process            |
| P3 E12 |   | x |   | <i>narQ</i> | GO:0023014 - signal transduction by protein phosphorylation<br>GO:0018106 - peptidyl-histidine phosphorylation<br>GO:0007165 - signal transduction<br>GO:0042128 - nitrate assimilation<br>GO:0016310 - phosphorylation<br>GO:0071249 - cellular response to nitrate<br>GO:0071250 - cellular response to nitrite<br>GO:0000160 - phosphorelay signal transduction system |

|        |   |   |   |             |                                                                                                                                                                                                                                                                                                                                                                                                                                                                                                                                             |
|--------|---|---|---|-------------|---------------------------------------------------------------------------------------------------------------------------------------------------------------------------------------------------------------------------------------------------------------------------------------------------------------------------------------------------------------------------------------------------------------------------------------------------------------------------------------------------------------------------------------------|
| P3 F4  |   | x |   | <i>nuoG</i> | GO:0055114 - oxidation-reduction process<br>GO:0042773 - ATP synthesis coupled electron transport<br>GO:0009060 - aerobic respiration                                                                                                                                                                                                                                                                                                                                                                                                       |
| P3 F9  |   | x |   | <i>dps</i>  | GO:0006950 - response to stress<br>GO:0030261 - chromosome condensation<br>GO:0042594 - response to starvation<br>GO:0055114 - oxidation-reduction process<br>GO:0006879 - cellular iron ion homeostasis                                                                                                                                                                                                                                                                                                                                    |
| P3 F12 |   | x |   | <i>yfhA</i> |                                                                                                                                                                                                                                                                                                                                                                                                                                                                                                                                             |
| P3 G3  |   | x |   | <i>nuoN</i> | GO:0055114 - oxidation-reduction process<br>GO:0015990 - electron transport coupled proton transport<br>GO:0042773 - ATP synthesis coupled electron transport<br>GO:0006810 - transport<br>GO:0009060 - aerobic respiration                                                                                                                                                                                                                                                                                                                 |
| P3 H1  | x |   |   | <i>icd</i>  | GO:0006979 - response to oxidative stress<br>GO:0055114 - oxidation-reduction process<br>GO:0022900 - electron transport chain<br>GO:0006097 - glyoxylate cycle<br>GO:0006099 - tricarboxylic acid cycle                                                                                                                                                                                                                                                                                                                                    |
| P3 H4  | x |   |   | <i>nuoE</i> | GO:0022904 - respiratory electron transport chain<br>GO:0055114 - oxidation-reduction process                                                                                                                                                                                                                                                                                                                                                                                                                                               |
| P5 A1  |   |   | x | <i>barA</i> | GO:0023014 - signal transduction by protein phosphorylation<br>GO:0018106 - peptidyl-histidine phosphorylation<br>GO:0016310 - phosphorylation<br>GO:0007165 - signal transduction<br>GO:0006468 - protein phosphorylation<br>GO:0006355 - regulation of transcription, DNA-templated<br>GO:0071310 - cellular response to organic substance<br>GO:0046777 - protein autophosphorylation<br>GO:0042542 - response to hydrogen peroxide<br>GO:0006351 - transcription, DNA-templated<br>GO:0000160 - phosphorelay signal transduction system |
| P5 A2  |   |   | x | <i>uhpA</i> | GO:0006351 - transcription, DNA-templated<br>GO:0006355 - regulation of transcription, DNA-templated<br>GO:0000160 - phosphorelay signal transduction system                                                                                                                                                                                                                                                                                                                                                                                |
| P5 A4  |   |   | x | <i>treA</i> | GO:0008152 - metabolic process<br>GO:0005991 - trehalose metabolic process<br>GO:0006974 - cellular response to DNA damage stimulus<br>GO:0005993 - trehalose catabolic process<br>GO:0071474 - cellular hyperosmotic response                                                                                                                                                                                                                                                                                                              |
| P5 A9  |   | x |   | <i>coaE</i> | GO:0016310 - phosphorylation<br>GO:0015937 - coenzyme A biosynthetic process                                                                                                                                                                                                                                                                                                                                                                                                                                                                |
| P5 B1  |   | x |   | <i>qseB</i> | GO:0010038 - response to metal ion<br>GO:0006355 - regulation of transcription, DNA-templated<br>GO:0000160 - phosphorelay signal transduction system<br>GO:0006351 - transcription, DNA-templated                                                                                                                                                                                                                                                                                                                                          |
| P5 B3  |   | x |   | <i>dcuR</i> | GO:0045893 - positive regulation of transcription, DNA-templated<br>GO:0009605 - response to external stimulus<br>GO:0006355 - regulation of transcription, DNA-templated<br>GO:0000160 - phosphorelay signal transduction system<br>GO:0006351 - transcription, DNA-templated                                                                                                                                                                                                                                                              |
| P5 B4  |   | x |   | <i>cpsB</i> | GO:0009058 - biosynthetic process<br>GO:0005976 - polysaccharide metabolic process<br>GO:0000271 - polysaccharide biosynthetic process<br>GO:0009298 - GDP-mannose biosynthetic process<br>GO:0006972 - hyperosmotic response<br>GO:0009103 - lipopolysaccharide biosynthetic process<br>GO:0009242 - colanic acid biosynthetic process                                                                                                                                                                                                     |
| P5 B8  |   | x |   | <i>tap</i>  | GO:0007165 - signal transduction<br>GO:0006935 - chemotaxis                                                                                                                                                                                                                                                                                                                                                                                                                                                                                 |
| P5 B9  |   | x |   | <i>ykfA</i> | GO:0000027 - ribosomal large subunit assembly                                                                                                                                                                                                                                                                                                                                                                                                                                                                                               |
| P5 B12 | x |   |   | <i>ypjB</i> |                                                                                                                                                                                                                                                                                                                                                                                                                                                                                                                                             |
| P5 C4  |   | x |   | <i>rbsB</i> | GO:0015749 - monosaccharide transport<br>GO:0008643 - carbohydrate transport<br>GO:0006935 - chemotaxis<br>GO:0006810 - transport                                                                                                                                                                                                                                                                                                                                                                                                           |
| P5 C6  |   |   | x | <i>yfdF</i> |                                                                                                                                                                                                                                                                                                                                                                                                                                                                                                                                             |
| P5 D1  |   | x |   | <i>rpoN</i> | GO:0006352 - DNA-templated transcription, initiation<br>GO:0006525 - arginine metabolic process<br>GO:0006355 - regulation of transcription, DNA-templated                                                                                                                                                                                                                                                                                                                                                                                  |

|        |   |   |   |             |                                                                                                                                                                                                                                                                                                                                                                                                                                                                                      |
|--------|---|---|---|-------------|--------------------------------------------------------------------------------------------------------------------------------------------------------------------------------------------------------------------------------------------------------------------------------------------------------------------------------------------------------------------------------------------------------------------------------------------------------------------------------------|
| P5 D4  |   | x |   | <i>oppA</i> | GO:0055085 - transmembrane transport<br>GO:0061077 - chaperone-mediated protein folding<br>GO:0009408 - response to heat<br>GO:0015833 - peptide transport<br>GO:0006810 - transport<br>GO:0015031 - protein transport<br>GO:0006857 - oligopeptide transport                                                                                                                                                                                                                        |
| P5 D5  |   | x |   | <i>lldD</i> | GO:0055114 - oxidation-reduction process<br>GO:0006089 - lactate metabolic process<br>GO:0019516 - lactate oxidation<br>GO:0009061 - anaerobic respiration<br>GO:0042355 - L-fucose catabolic process<br>GO:0009060 - aerobic respiration                                                                                                                                                                                                                                            |
| P5 D8  |   | x |   | <i>helD</i> | GO:0032508 - DNA duplex unwinding<br>GO:0023014 - signal transduction by protein phosphorylation<br>GO:0000160 - phosphorelay signal transduction system<br>GO:0006310 - DNA recombination                                                                                                                                                                                                                                                                                           |
| P5 E1  |   |   | x | <i>arcB</i> | GO:0023014 - signal transduction by protein phosphorylation<br>GO:0018106 - peptidyl-histidine phosphorylation<br>GO:0016310 - phosphorylation<br>GO:0007165 - signal transduction<br>GO:0006355 - regulation of transcription, DNA-templated<br>GO:0006351 - transcription, DNA-templated<br>GO:0046777 - protein autophosphorylation<br>GO:0000160 - phosphorelay signal transduction system                                                                                       |
| P5 E2  |   |   | x | <i>cpxR</i> | GO:0007155 - cell adhesion<br>GO:0010810 - regulation of cell-substrate adhesion<br>GO:0006355 - regulation of transcription, DNA-templated<br>GO:0006351 - transcription, DNA-templated<br>GO:0045892 - negative regulation of transcription, DNA-templated<br>GO:0045893 - positive regulation of transcription, DNA-templated<br>GO:0000160 - phosphorelay signal transduction system                                                                                             |
| P5 E5  | x |   |   | <i>pgm</i>  | GO:0071704 - organic substance metabolic process<br>GO:0019388 - galactose catabolic process<br>GO:0005978 - glycogen biosynthetic process<br>GO:0005975 - carbohydrate metabolic process<br>GO:0006006 - glucose metabolic process                                                                                                                                                                                                                                                  |
| P5 E6  |   | x |   | <i>cusA</i> | GO:1902601 - silver ion transmembrane transport<br>GO:0006825 - copper ion transport<br>GO:0006812 - cation transport<br>GO:0006811 - ion transport<br>GO:0006810 - transport<br>GO:0006878 - cellular copper ion homeostasis<br>GO:0010272 - response to silver ion<br>GO:0010273 - detoxification of copper ion<br>GO:0015673 - silver ion transport<br>GO:0015679 - plasma membrane copper ion transport<br>GO:0046688 - response to copper ion<br>GO:0060003 - copper ion export |
| P5 E8  | x |   |   | <i>hrpA</i> | GO:0009451 - RNA modification<br>GO:0006397 - mRNA processing                                                                                                                                                                                                                                                                                                                                                                                                                        |
| P5 E9  |   | x |   | <i>yahL</i> |                                                                                                                                                                                                                                                                                                                                                                                                                                                                                      |
| P5 E11 |   | x |   | <i>yfiN</i> | GO:0036460 - cellular response to cell envelope stress<br>GO:0008152 - metabolic process<br>GO:1902201 - negative regulation of bacterial-type flagellum-dependent cell motility<br>GO:0007165 - signal transduction                                                                                                                                                                                                                                                                 |
| P5 E12 | x |   |   | <i>yqaD</i> | GO:0005975 - carbohydrate metabolic process                                                                                                                                                                                                                                                                                                                                                                                                                                          |
| P5 F2  |   | x |   | <i>zraS</i> | GO:0007165 - signal transduction<br>GO:0023014 - signal transduction by protein phosphorylation<br>GO:0018106 - peptidyl-histidine phosphorylation<br>GO:0016310 - phosphorylation<br>GO:0071294 - cellular response to zinc ion<br>GO:0071284 - cellular response to lead ion<br>GO:0046777 - protein autophosphorylation<br>GO:0000160 - phosphorelay signal transduction system                                                                                                   |
| P5 F3  |   | x |   | <i>arcA</i> | GO:0006351 - transcription, DNA-templated<br>GO:0045892 - negative regulation of transcription, DNA-templated<br>GO:0045893 - positive regulation of transcription, DNA-templated<br>GO:0006355 - regulation of transcription, DNA-templated<br>GO:0000160 - phosphorelay signal transduction system                                                                                                                                                                                 |

|        |   |   |   |             |                                                                                                                                                                                                                                                                                                                                                                                                                                                                                                     |
|--------|---|---|---|-------------|-----------------------------------------------------------------------------------------------------------------------------------------------------------------------------------------------------------------------------------------------------------------------------------------------------------------------------------------------------------------------------------------------------------------------------------------------------------------------------------------------------|
| P5 F4  | x |   |   | <i>mt</i>   | GO:0090503 - RNA phosphodiester bond hydrolysis, exonucleolytic<br>GO:0090501 - RNA phosphodiester bond hydrolysis<br>GO:0090305 - nucleic acid phosphodiester bond hydrolysis<br>GO:0008033 - tRNA processing<br>GO:0006396 - RNA processing<br>GO:0042780 - tRNA 3'-end processing                                                                                                                                                                                                                |
| P5 F7  |   | x |   | <i>gspA</i> | GO:0006810 - transport                                                                                                                                                                                                                                                                                                                                                                                                                                                                              |
| P5 F8  |   | x |   | <i>moaA</i> | GO:0009408 - response to heat<br>GO:0006777 - Mo-molybdopterin cofactor biosynthetic process                                                                                                                                                                                                                                                                                                                                                                                                        |
| P5 F9  |   | x |   | <i>aceE</i> | GO:0008152 - metabolic process<br>GO:0055114 - oxidation-reduction process<br>GO:0006096 - glycolytic process                                                                                                                                                                                                                                                                                                                                                                                       |
| P5 G5  |   | x |   | <i>cydB</i> | GO:0019646 - aerobic electron transport chain<br>GO:0006119 - oxidative phosphorylation<br>GO:0055114 - oxidation-reduction process                                                                                                                                                                                                                                                                                                                                                                 |
| P5 G6  |   | x |   | <i>thiA</i> | GO:0044718 - siderophore transmembrane transport<br>GO:0015891 - siderophore transport<br>GO:0055072 - iron ion homeostasis<br>GO:0006811 - ion transport<br>GO:0006810 - transport                                                                                                                                                                                                                                                                                                                 |
| P5 G8  |   | x |   | <i>speE</i> | GO:0006596 - polyamine biosynthetic process<br>GO:0008295 - spermidine biosynthetic process                                                                                                                                                                                                                                                                                                                                                                                                         |
| P5 G9  | x |   |   | <i>lpd</i>  | GO:0006979 - response to oxidative stress<br>GO:0045454 - cell redox homeostasis<br>GO:0006103 - 2-oxoglutarate metabolic process<br>GO:0006090 - pyruvate metabolic process<br>GO:0055114 - oxidation-reduction process<br>GO:0006096 - glycolytic process<br>GO:0019464 - glycine decarboxylation via glycine cleavage system                                                                                                                                                                     |
| P5 G10 |   | x |   | <i>ypdI</i> | GO:0009242 - colanic acid biosynthetic process                                                                                                                                                                                                                                                                                                                                                                                                                                                      |
| P5 G12 | x |   |   | <i>hha</i>  | GO:0006355 - regulation of transcription, DNA-templated<br>GO:0006351 - transcription, DNA-templated<br>GO:0010468 - regulation of gene expression                                                                                                                                                                                                                                                                                                                                                  |
| P5 H1  |   | x |   | <i>uhpB</i> | GO:0006470 - protein dephosphorylation<br>GO:0023014 - signal transduction by protein phosphorylation<br>GO:0018106 - peptidyl-histidine phosphorylation<br>GO:0016310 - phosphorylation<br>GO:0046777 - protein autophosphorylation<br>GO:0000160 - phosphorelay signal transduction system                                                                                                                                                                                                        |
| P5 H6  |   | x |   | <i>pstB</i> | GO:0008152 - metabolic process<br>GO:0006810 - transport<br>GO:0035435 - phosphate ion transmembrane transport<br>GO:0006817 - phosphate ion transport                                                                                                                                                                                                                                                                                                                                              |
| P5 H9  |   | x |   | <i>fbp</i>  | GO:0030388 - fructose 1,6-bisphosphate metabolic process<br>GO:0006002 - fructose 6-phosphate metabolic process<br>GO:0006000 - fructose metabolic process<br>GO:0005986 - sucrose biosynthetic process<br>GO:0006001 - fructose catabolic process<br>GO:0051289 - protein homotetramerization<br>GO:0016311 - dephosphorylation<br>GO:0016051 - carbohydrate biosynthetic process<br>GO:0008152 - metabolic process<br>GO:0005975 - carbohydrate metabolic process<br>GO:0006094 - gluconeogenesis |
| P7 A3  |   | x |   | <i>ybhC</i> | GO:0008152 - metabolic process<br>GO:0042545 - cell wall modification                                                                                                                                                                                                                                                                                                                                                                                                                               |
| P7 A12 |   | x |   | <i>pepT</i> | GO:0043171 - peptide catabolic process<br>GO:0008152 - metabolic process<br>GO:0006518 - peptide metabolic process<br>GO:0006508 - proteolysis                                                                                                                                                                                                                                                                                                                                                      |
| P7 G8  |   | x |   | <i>yidZ</i> | GO:0006355 - regulation of transcription, DNA-templated<br>GO:0006351 - transcription, DNA-templated                                                                                                                                                                                                                                                                                                                                                                                                |
| P7 G11 |   | x |   | <i>pepN</i> | GO:0043171 - peptide catabolic process<br>GO:0006508 - proteolysis                                                                                                                                                                                                                                                                                                                                                                                                                                  |
| P9 E1  |   |   | x | <i>ptrB</i> | GO:0006508 - proteolysis                                                                                                                                                                                                                                                                                                                                                                                                                                                                            |
| P9 E2  |   |   | x | <i>pepB</i> | GO:0043171 - peptide catabolic process<br>GO:0019538 - protein metabolic process<br>GO:0006508 - proteolysis                                                                                                                                                                                                                                                                                                                                                                                        |
| P9 E3  |   |   | x | <i>yggG</i> |                                                                                                                                                                                                                                                                                                                                                                                                                                                                                                     |
| P9 E4  |   |   | x | <i>degQ</i> | GO:0051603 - proteolysis involved in cellular protein catabolic process<br>GO:0006508 - proteolysis                                                                                                                                                                                                                                                                                                                                                                                                 |



|         |   |   |   |             |                                                                                                                                                                                                                                                                                                                                                                                                                                                               |
|---------|---|---|---|-------------|---------------------------------------------------------------------------------------------------------------------------------------------------------------------------------------------------------------------------------------------------------------------------------------------------------------------------------------------------------------------------------------------------------------------------------------------------------------|
| P9 G6   |   | x |   | <i>pepE</i> | GO:0006508 - proteolysis                                                                                                                                                                                                                                                                                                                                                                                                                                      |
| P9 G10  |   | x |   | <i>yfcR</i> | GO:0007155 - cell adhesion                                                                                                                                                                                                                                                                                                                                                                                                                                    |
| P13 G7  |   | x |   | <i>yciC</i> |                                                                                                                                                                                                                                                                                                                                                                                                                                                               |
| P13 G8  |   | x |   | <i>mpaA</i> | GO:0006508 - proteolysis<br>GO:0009253 - peptidoglycan catabolic process<br>GO:0009050 - glycopeptide catabolic process                                                                                                                                                                                                                                                                                                                                       |
| P15 C9  | x |   |   | <i>ybfQ</i> |                                                                                                                                                                                                                                                                                                                                                                                                                                                               |
| P15 D4  |   |   | x | <i>yaiV</i> | GO:0006351 - transcription, DNA-templated                                                                                                                                                                                                                                                                                                                                                                                                                     |
| P15 E9  |   | x |   | <i>ybgE</i> |                                                                                                                                                                                                                                                                                                                                                                                                                                                               |
| P15 F7  |   |   | x | <i>ybdD</i> |                                                                                                                                                                                                                                                                                                                                                                                                                                                               |
| P15 G5  | x |   |   | <i>ybaP</i> |                                                                                                                                                                                                                                                                                                                                                                                                                                                               |
| P15 G6  |   | x |   | <i>ybcO</i> |                                                                                                                                                                                                                                                                                                                                                                                                                                                               |
| P15 G7  |   | x |   | <i>ybdM</i> |                                                                                                                                                                                                                                                                                                                                                                                                                                                               |
| P15 H6  |   | x |   | <i>ybcQ</i> | GO:0044010 - single-species biofilm formation<br>GO:0060567 - negative regulation of DNA-templated transcription, termination<br>GO:0006355 - regulation of transcription, DNA-templated<br>GO:0031564 - transcription antitermination<br>GO:0006351 - transcription, DNA-templated                                                                                                                                                                           |
| P15 H10 | x |   |   | <i>ybjN</i> | GO:1902209 - negative regulation of bacterial-type flagellum assembly<br>GO:0010212 - response to ionizing radiation<br>GO:1902208 - regulation of bacterial-type flagellum assembly<br>GO:1900232 - negative regulation of single-species biofilm formation on inanimate substrate<br>GO:0030308 - negative regulation of cell growth<br>GO:0009297 - pilus assembly<br>GO:1902201 - negative regulation of bacterial-type flagellum-dependent cell motility |
| P17 A2  |   |   | x | <i>ycjX</i> |                                                                                                                                                                                                                                                                                                                                                                                                                                                               |
| P17 B3  |   | x |   | <i>yniA</i> | GO:0016310 - phosphorylation                                                                                                                                                                                                                                                                                                                                                                                                                                  |
| P17 B4  |   | x |   | <i>yejL</i> |                                                                                                                                                                                                                                                                                                                                                                                                                                                               |
| P17 E5  |   | x |   | <i>yfhJ</i> | GO:0043086 - negative regulation of catalytic activity<br>GO:0016226 - iron-sulfur cluster assembly                                                                                                                                                                                                                                                                                                                                                           |
| P17 E6  |   | x |   | <i>yaaX</i> |                                                                                                                                                                                                                                                                                                                                                                                                                                                               |
| P17 F11 |   | x |   | <i>ybeA</i> | GO:0032259 - methylation<br>GO:0006364 - rRNA processing<br>GO:0031167 - rRNA methylation<br>GO:0070475 - rRNA base methylation                                                                                                                                                                                                                                                                                                                               |
| P17 G3  |   | x |   | <i>yeeX</i> |                                                                                                                                                                                                                                                                                                                                                                                                                                                               |
| P17 G4  |   | x |   | <i>yfcN</i> |                                                                                                                                                                                                                                                                                                                                                                                                                                                               |
| P17 H7  | x |   |   | <i>yaeQ</i> |                                                                                                                                                                                                                                                                                                                                                                                                                                                               |
| P17 H9  |   | x |   | <i>yeeS</i> |                                                                                                                                                                                                                                                                                                                                                                                                                                                               |
| P17 H11 | x |   |   | <i>ybeT</i> |                                                                                                                                                                                                                                                                                                                                                                                                                                                               |
| P17 H12 | x |   |   | <i>yedK</i> | GO:0006508 - proteolysis                                                                                                                                                                                                                                                                                                                                                                                                                                      |
| P19 A9  |   | x |   | <i>mraW</i> | GO:0032259 - methylation<br>GO:0006364 - rRNA processing<br>GO:0070475 - rRNA base methylation                                                                                                                                                                                                                                                                                                                                                                |
| P19 B1  | x |   |   | <i>yegU</i> | GO:0008152 - metabolic process                                                                                                                                                                                                                                                                                                                                                                                                                                |
| P19 B2  |   | x |   | <i>yaaH</i> | GO:0015992 - proton transport<br>GO:0006811 - ion transport<br>GO:0006810 - transport<br>GO:0035433 - acetate transmembrane transport<br>GO:0071422 - succinate transmembrane transport                                                                                                                                                                                                                                                                       |
| P19 B3  |   | x |   | <i>ybgH</i> | GO:0015992 - proton transport<br>GO:0015833 - peptide transport<br>GO:0006857 - oligopeptide transport<br>GO:0006810 - transport<br>GO:0015031 - protein transport<br>GO:0042938 - dipeptide transport                                                                                                                                                                                                                                                        |
| P19 B4  |   | x |   | <i>ydiU</i> |                                                                                                                                                                                                                                                                                                                                                                                                                                                               |
| P19 D8  |   | x |   | <i>ycdO</i> | GO:0009411 - response to UV<br>GO:0009636 - response to toxic substance<br>GO:0006979 - response to oxidative stress<br>GO:0046677 - response to antibiotic                                                                                                                                                                                                                                                                                                   |
| P19 D11 |   | x |   | <i>iscA</i> | GO:0097428 - protein maturation by iron-sulfur cluster transfer<br>GO:0006790 - sulfur compound metabolic process<br>GO:0016226 - iron-sulfur cluster assembly                                                                                                                                                                                                                                                                                                |
| P19 E7  |   | x |   | <i>ycaP</i> |                                                                                                                                                                                                                                                                                                                                                                                                                                                               |
| P19 E8  | x |   |   | <i>yebC</i> | GO:0010212 - response to ionizing radiation<br>GO:0006355 - regulation of transcription, DNA-templated<br>GO:0006351 - transcription, DNA-templated                                                                                                                                                                                                                                                                                                           |

|         |   |   |   |             |                                                                                                                                                                                                                                                                                                           |
|---------|---|---|---|-------------|-----------------------------------------------------------------------------------------------------------------------------------------------------------------------------------------------------------------------------------------------------------------------------------------------------------|
| P19 E11 |   | x |   | <i>ygbL</i> | GO:0019323 - pentose catabolic process                                                                                                                                                                                                                                                                    |
| P19 E12 | x |   |   | <i>ybhK</i> | GO:0008360 - regulation of cell shape                                                                                                                                                                                                                                                                     |
| P19 G2  |   | x |   | <i>ybbY</i> | GO:0055085 - transmembrane transport<br>GO:0006810 - transport                                                                                                                                                                                                                                            |
| P19 H3  |   | x |   | <i>ydgR</i> |                                                                                                                                                                                                                                                                                                           |
| P19 H5  |   | x |   | <i>ybbB</i> |                                                                                                                                                                                                                                                                                                           |
| P19 H6  |   | x |   | <i>ybhH</i> | GO:0008152 - metabolic process                                                                                                                                                                                                                                                                            |
| P19 H8  |   | x |   | <i>yfaE</i> | GO:0055114 - oxidation-reduction process<br>GO:0006124 - ferredoxin metabolic process                                                                                                                                                                                                                     |
| P19 H9  |   | x |   | <i>ydjI</i> | GO:0005975 - carbohydrate metabolic process                                                                                                                                                                                                                                                               |
| P19 H10 |   | x |   | <i>yciV</i> | GO:0090503 - RNA phosphodiester bond hydrolysis, exonucleolytic<br>GO:0090305 - nucleic acid phosphodiester bond hydrolysis<br>GO:0016311 - dephosphorylation<br>GO:0006260 - DNA replication<br>GO:0071897 - DNA biosynthetic process                                                                    |
| P19 H11 |   | x |   | <i>uspE</i> | GO:0071973 - bacterial-type flagellum-dependent cell motility<br>GO:0034644 - cellular response to UV<br>GO:0044010 - single-species biofilm formation<br>GO:0070301 - cellular response to hydrogen peroxide<br>GO:0006950 - response to stress                                                          |
| P19 H12 |   | x |   | <i>abgR</i> | GO:0006355 - regulation of transcription, DNA-templated<br>GO:0006351 - transcription, DNA-templated                                                                                                                                                                                                      |
| P21 A7  |   |   | x | <i>wbbL</i> | GO:0045226 - extracellular polysaccharide biosynthetic process<br>GO:0009103 - lipopolysaccharide biosynthetic process                                                                                                                                                                                    |
| P21 D5  |   | x |   | <i>ykfG</i> |                                                                                                                                                                                                                                                                                                           |
| P21 D8  |   | x |   | <i>yeil</i> | GO:0016310 - phosphorylation                                                                                                                                                                                                                                                                              |
| P21 D9  |   | x |   | <i>yfbF</i> | GO:0006629 - lipid metabolic process<br>GO:0036108 - 4-amino-4-deoxy-alpha-L-arabinopyranosyl undecaprenyl phosphate biosynthetic process<br>GO:0046677 - response to antibiotic<br>GO:0009245 - lipid A biosynthetic process<br>GO:0009103 - lipopolysaccharide biosynthetic process                     |
| P21 D12 | x |   |   | <i>yfhD</i> | GO:0009253 - peptidoglycan catabolic process<br>GO:0071555 - cell wall organization<br>GO:0000270 - peptidoglycan metabolic process<br>GO:0016998 - cell wall macromolecule catabolic process                                                                                                             |
| P21 E12 |   | x |   | <i>yfhH</i> | GO:0005975 - carbohydrate metabolic process<br>GO:0006355 - regulation of transcription, DNA-templated<br>GO:0006351 - transcription, DNA-templated                                                                                                                                                       |
| P21 F4  |   | x |   | <i>ydiF</i> | GO:0046952 - ketone body catabolic process<br>GO:0008152 - metabolic process<br>GO:0051289 - protein homotetramerization<br>GO:0046459 - short-chain fatty acid metabolic process                                                                                                                         |
| P21 F9  |   |   | x | <i>yfbB</i> | GO:0009234 - menaquinone biosynthetic process                                                                                                                                                                                                                                                             |
| P21 F12 | x |   |   | <i>yfiC</i> | GO:0032259 - methylation<br>GO:0008033 - tRNA processing<br>GO:0030488 - tRNA methylation                                                                                                                                                                                                                 |
| P21 G10 |   |   | x | <i>ypdB</i> | GO:0046677 - response to antibiotic<br>GO:0048870 - cell motility<br>GO:1900192 - positive regulation of single-species biofilm formation<br>GO:0006355 - regulation of transcription, DNA-templated<br>GO:0000160 - phosphorelay signal transduction system<br>GO:0006351 - transcription, DNA-templated |
| P23 B8  |   | x |   | <i>gmr</i>  |                                                                                                                                                                                                                                                                                                           |
| P23 C1  |   |   | x | <i>ygaV</i> | GO:0045892 - negative regulation of transcription, DNA-templated<br>GO:0006355 - regulation of transcription, DNA-templated<br>GO:0006351 - transcription, DNA-templated                                                                                                                                  |
| P23 C3  |   |   | x | <i>ycbL</i> | GO:0019243 - methylglyoxal catabolic process to D-lactate via S-lactoyl-glutathione                                                                                                                                                                                                                       |
| P23 C10 |   |   | x | <i>yddW</i> | GO:0005975 - carbohydrate metabolic process                                                                                                                                                                                                                                                               |
| P23 F9  | x |   |   | <i>ynbA</i> | GO:0008654 - phospholipid biosynthetic process                                                                                                                                                                                                                                                            |
| P23 G1  |   | x |   | <i>yqaB</i> | GO:0016311 - dephosphorylation<br>GO:0008152 - metabolic process                                                                                                                                                                                                                                          |
| P23 G8  |   |   | x | <i>ynal</i> | GO:0006810 - transport<br>GO:0055085 - transmembrane transport<br>GO:0071470 - cellular response to osmotic stress<br>GO:0006811 - ion transport                                                                                                                                                          |
| P25 D7  |   |   | x | <i>ybaZ</i> |                                                                                                                                                                                                                                                                                                           |
| P25 E8  |   | x |   | <i>ybeD</i> |                                                                                                                                                                                                                                                                                                           |

|         |   |   |   |             |                                                                                                                                                                                                                                                                                                                                        |
|---------|---|---|---|-------------|----------------------------------------------------------------------------------------------------------------------------------------------------------------------------------------------------------------------------------------------------------------------------------------------------------------------------------------|
| P25 F12 | x |   |   | <i>yccC</i> | GO:000271 - polysaccharide biosynthetic process<br>GO:0045226 - extracellular polysaccharide biosynthetic process<br>GO:0016310 - phosphorylation<br>GO:0009103 - lipopolysaccharide biosynthetic process<br>GO:0038083 - peptidyl-tyrosine autophosphorylation                                                                        |
| P25 G4  |   | x |   | <i>thiP</i> | GO:0015888 - thiamine transport<br>GO:0006810 - transport                                                                                                                                                                                                                                                                              |
| P25 H5  | x |   |   | <i>yahA</i> | GO:0045893 - positive regulation of transcription, DNA-templated<br>GO:0008152 - metabolic process<br>GO:0006355 - regulation of transcription, DNA-templated                                                                                                                                                                          |
| P25 H9  | x |   |   | <i>ybhS</i> | GO:0006855 - drug transmembrane transport<br>GO:0055085 - transmembrane transport<br>GO:0006810 - transport                                                                                                                                                                                                                            |
| P25 H10 | x |   |   | <i>yliG</i> | GO:0035600 - tRNA methylthiolation<br>GO:0043412 - macromolecule modification<br>GO:0009451 - RNA modification<br>GO:0018339 - peptidyl-L-beta-methylthioaspartic acid biosynthetic process from peptidyl-aspartic acid                                                                                                                |
| P25 H12 |   | x |   | <i>wcaJ</i> | GO:0000271 - polysaccharide biosynthetic process<br>GO:0009242 - colanic acid biosynthetic process<br>GO:0009103 - lipopolysaccharide biosynthetic process                                                                                                                                                                             |
| P27 C4  |   |   | x | <i>yfhL</i> |                                                                                                                                                                                                                                                                                                                                        |
| P27 E1  |   |   | x | <i>asmA</i> | GO:0090313 - regulation of protein targeting to membrane                                                                                                                                                                                                                                                                               |
| P29 D6  |   | x |   | <i>ydiT</i> | GO:0055114 - oxidation-reduction process                                                                                                                                                                                                                                                                                               |
| P29 G12 |   |   | x | <i>yiaK</i> | GO:0008152 - metabolic process<br>GO:0055114 - oxidation-reduction process                                                                                                                                                                                                                                                             |
| P29 H11 |   |   | x | <i>tar</i>  | GO:0007165 - signal transduction<br>GO:0006935 - chemotaxis                                                                                                                                                                                                                                                                            |
| P29 H12 |   |   | x | <i>allD</i> | GO:0008152 - metabolic process<br>GO:0000256 - allantoin catabolic process<br>GO:0055114 - oxidation-reduction process<br>GO:0006144 - purine nucleobase metabolic process<br>GO:0009442 - allantoin assimilation pathway                                                                                                              |
| P31 A1  |   |   | x | <i>aceK</i> | GO:0006470 - protein dephosphorylation<br>GO:0016311 - dephosphorylation<br>GO:0016310 - phosphorylation<br>GO:0006006 - glucose metabolic process<br>GO:0018105 - peptidyl-serine phosphorylation<br>GO:0050790 - regulation of catalytic activity<br>GO:0006099 - tricarboxylic acid cycle<br>GO:0006097 - glyoxylate cycle          |
| P31 B9  |   |   | x | <i>ymgB</i> | GO:0071229 - cellular response to acid chemical<br>GO:0042710 - biofilm formation<br>GO:0042542 - response to hydrogen peroxide                                                                                                                                                                                                        |
| P31 B11 |   |   | x | <i>yddK</i> |                                                                                                                                                                                                                                                                                                                                        |
| P31 D2  |   | x |   | <i>ahpF</i> | GO:0045454 - cell redox homeostasis<br>GO:0000302 - response to reactive oxygen species<br>GO:0055114 - oxidation-reduction process                                                                                                                                                                                                    |
| P31 E12 |   | x |   | <i>yobG</i> | GO:0070298 - negative regulation of phosphorelay signal transduction system<br>GO:0006355 - regulation of transcription, DNA-templated<br>GO:0006351 - transcription, DNA-templated<br>GO:0044092 - negative regulation of molecular function<br>GO:0010447 - response to acidic pH<br>GO:0071286 - cellular response to magnesium ion |
| P31 G8  | x |   |   | <i>elbA</i> | GO:0045893 - positive regulation of transcription, DNA-templated<br>GO:0009267 - cellular response to starvation<br>GO:0006950 - response to stress<br>GO:0071468 - cellular response to acidic pH<br>GO:0042177 - negative regulation of protein catabolic process<br>GO:0010350 - cellular response to magnesium starvation          |
| P33 A3  |   |   | x | <i>yqeB</i> |                                                                                                                                                                                                                                                                                                                                        |
| P33 B1  |   |   | x | <i>yedX</i> | GO:0006144 - purine nucleobase metabolic process                                                                                                                                                                                                                                                                                       |
| P33 B2  |   |   | x | <i>ydjL</i> | GO:0055114 - oxidation-reduction process                                                                                                                                                                                                                                                                                               |
| P33 D10 |   | x |   | <i>sstT</i> | GO:0055085 - transmembrane transport<br>GO:0003333 - amino acid transmembrane transport<br>GO:0006865 - amino acid transport<br>GO:0006810 - transport<br>GO:0015826 - threonine transport<br>GO:0006835 - dicarboxylic acid transport<br>GO:0032329 - serine transport                                                                |

|         |   |   |   |             |                                                                                                                                                                                                                                                                                                       |
|---------|---|---|---|-------------|-------------------------------------------------------------------------------------------------------------------------------------------------------------------------------------------------------------------------------------------------------------------------------------------------------|
| P33 E1  |   |   | x | <i>yfbN</i> |                                                                                                                                                                                                                                                                                                       |
| P33 E5  |   | x |   | <i>yggH</i> | GO:0030488 - tRNA methylation<br>GO:0006400 - tRNA modification<br>GO:0036265 - RNA (guanine-N7)-methylation<br>GO:0032259 - methylation<br>GO:0008033 - tRNA processing                                                                                                                              |
| P33 E6  |   | x |   | <i>yghZ</i> |                                                                                                                                                                                                                                                                                                       |
| P33 E10 |   | x |   | <i>ygiV</i> |                                                                                                                                                                                                                                                                                                       |
| P33 H12 | x |   |   | <i>nlpI</i> | GO:0051301 - cell division<br>GO:0007049 - cell cycle                                                                                                                                                                                                                                                 |
| P35 D9  |   | x |   | <i>mdtF</i> | GO:0006810 - transport<br>GO:0006855 - drug transmembrane transport<br>GO:0046677 - response to antibiotic                                                                                                                                                                                            |
| P35 F10 |   |   | x | <i>yiaC</i> | GO:0006474 - N-terminal protein amino acid acetylation                                                                                                                                                                                                                                                |
| P37 A4  |   |   | x | <i>rnuC</i> | GO:0006310 - DNA recombination                                                                                                                                                                                                                                                                        |
| P37 A6  |   | x |   | <i>yjiR</i> |                                                                                                                                                                                                                                                                                                       |
| P37 B8  |   | x |   | <i>yjbl</i> |                                                                                                                                                                                                                                                                                                       |
| P37 C1  |   |   | x | <i>ade</i>  |                                                                                                                                                                                                                                                                                                       |
| P37 C5  | x |   |   | <i>yihT</i> | GO:0061720 - 6-sulfoquinovose(1-) catabolic process to glycerone phosphate and 3-sulfolactaldehyde<br>GO:1902777 - 6-sulfoquinovose(1-) catabolic process                                                                                                                                             |
| P37 D1  | x |   |   | <i>yidG</i> |                                                                                                                                                                                                                                                                                                       |
| P37 D2  | x |   |   | <i>yieF</i> | GO:0055114 - oxidation-reduction process<br>GO:0006805 - xenobiotic metabolic process                                                                                                                                                                                                                 |
| P37 D3  | x |   |   | <i>rffC</i> | GO:0009246 - enterobacterial common antigen biosynthetic process                                                                                                                                                                                                                                      |
| P37 D4  | x |   |   | <i>yihI</i> | GO:0042254 - ribosome biogenesis<br>GO:0043547 - positive regulation of GTPase activity<br>GO:0090071 - negative regulation of ribosome biogenesis                                                                                                                                                    |
| P37 D6  |   |   | x | <i>yiiX</i> |                                                                                                                                                                                                                                                                                                       |
| P37 D11 | x |   |   | <i>yjeN</i> |                                                                                                                                                                                                                                                                                                       |
| P37 E6  |   | x |   | <i>yjF</i>  |                                                                                                                                                                                                                                                                                                       |
| P37 E7  |   | x |   | <i>yjB</i>  |                                                                                                                                                                                                                                                                                                       |
| P37 E8  |   | x |   | <i>yjM</i>  |                                                                                                                                                                                                                                                                                                       |
| P37 E11 |   |   | x | <i>yjeO</i> |                                                                                                                                                                                                                                                                                                       |
| P37 F3  | x |   |   | <i>yigA</i> |                                                                                                                                                                                                                                                                                                       |
| P37 G8  |   | x |   | <i>yjBR</i> |                                                                                                                                                                                                                                                                                                       |
| P37 G12 |   | x |   | <i>yjFM</i> |                                                                                                                                                                                                                                                                                                       |
| P37 H4  | x |   |   | <i>ompL</i> | GO:0055085 - transmembrane transport<br>GO:0046323 - glucose import<br>GO:0015757 - galactose transport<br>GO:0015751 - arabinose transport<br>GO:0008643 - carbohydrate transport<br>GO:0006811 - ion transport<br>GO:0006810 - transport                                                            |
| P39 B6  |   |   | x | <i>yjiK</i> |                                                                                                                                                                                                                                                                                                       |
| P39 B10 |   |   | x | <i>mrr</i>  | GO:0090305 - nucleic acid phosphodiester bond hydrolysis<br>GO:0051599 - response to hydrostatic pressure<br>GO:0009307 - DNA restriction-modification system                                                                                                                                         |
| P39 C7  |   | x |   | <i>mfd</i>  | GO:0006283 - transcription-coupled nucleotide-excision repair<br>GO:0006974 - cellular response to DNA damage stimulus<br>GO:0000716 - transcription-coupled nucleotide-excision repair, DNA damage recognition<br>GO:0006355 - regulation of transcription, DNA-templated<br>GO:0006281 - DNA repair |
| P39 D10 |   | x |   | <i>hoID</i> | GO:0071897 - DNA biosynthetic process<br>GO:0090305 - nucleic acid phosphodiester bond hydrolysis<br>GO:0006260 - DNA replication                                                                                                                                                                     |
| P39 D12 |   | x |   | <i>tauB</i> | GO:0015837 - amine transport<br>GO:0008152 - metabolic process<br>GO:0010438 - cellular response to sulfur starvation<br>GO:0015734 - taurine transport<br>GO:0006810 - transport                                                                                                                     |
| P39 F1  |   | x |   | <i>ytfG</i> | GO:0055114 - oxidation-reduction process                                                                                                                                                                                                                                                              |
| P39 G1  |   | x |   | <i>ytfJ</i> |                                                                                                                                                                                                                                                                                                       |
| P43 A1  |   | x |   | <i>serB</i> | GO:0008152 - metabolic process<br>GO:0016311 - dephosphorylation<br>GO:0008652 - cellular amino acid biosynthetic process<br>GO:0006564 - L-serine biosynthetic process                                                                                                                               |

|         |   |   |   |             |                                                                                                                                                                                                                                                                             |
|---------|---|---|---|-------------|-----------------------------------------------------------------------------------------------------------------------------------------------------------------------------------------------------------------------------------------------------------------------------|
| P43 A2  |   | x |   | <i>entF</i> | GO:0009058 - biosynthetic process<br>GO:0008152 - metabolic process<br>GO:0043041 - amino acid activation for nonribosomal peptide biosynthetic process<br>GO:0009239 - enterobactin biosynthetic process                                                                   |
| P43 C2  | x |   |   | <i>entE</i> | GO:0019290 - siderophore biosynthetic process<br>GO:0008152 - metabolic process<br>GO:0009239 - enterobactin biosynthetic process                                                                                                                                           |
| P43 C6  |   |   | x | <i>menE</i> | GO:0051289 - protein homotetramerization<br>GO:0008152 - metabolic process<br>GO:0009234 - menaquinone biosynthetic process                                                                                                                                                 |
| P43 D2  |   | x |   | <i>entB</i> | GO:0002047 - phenazine biosynthetic process<br>GO:0008152 - metabolic process<br>GO:0009239 - enterobactin biosynthetic process                                                                                                                                             |
| P43 D11 |   | x |   | <i>csgA</i> | GO:1990000 - amyloid fibril formation<br>GO:0044010 - single-species biofilm formation<br>GO:0007155 - cell adhesion                                                                                                                                                        |
| P43 D12 | x |   |   | <i>flgG</i> | GO:0071978 - bacterial-type flagellum-dependent swarming motility<br>GO:0071973 - bacterial-type flagellum-dependent cell motility<br>GO:0044781 - bacterial-type flagellum organization                                                                                    |
| P43 E5  | x |   |   | <i>cobU</i> | GO:0051188 - cofactor biosynthetic process<br>GO:0006974 - cellular response to DNA damage stimulus<br>GO:0006779 - porphyrin-containing compound biosynthetic process<br>GO:0016310 - phosphorylation<br>GO:0009236 - cobalamin biosynthetic process                       |
| P43 E7  | x |   |   | <i>idi</i>  | GO:0009240 - isopentenyl diphosphate biosynthetic process<br>GO:0050992 - dimethylallyl diphosphate biosynthetic process<br>GO:0006974 - cellular response to DNA damage stimulus<br>GO:0008299 - isoprenoid biosynthetic process                                           |
| P43 E8  |   | x |   | <i>fre</i>  | GO:0043085 - positive regulation of catalytic activity<br>GO:0030091 - protein repair<br>GO:0006979 - response to oxidative stress<br>GO:0055072 - iron ion homeostasis<br>GO:0055114 - oxidation-reduction process<br>GO:0006811 - ion transport<br>GO:0006810 - transport |
| P43 E11 |   | x |   | <i>flgN</i> | GO:0044781 - bacterial-type flagellum organization<br>GO:0044780 - bacterial-type flagellum assembly                                                                                                                                                                        |
| P43 F3  |   | x |   | <i>moaC</i> | GO:0034214 - protein hexamerization<br>GO:0032324 - molybdopterin cofactor biosynthetic process<br>GO:0006777 - Mo-molybdopterin cofactor biosynthetic process                                                                                                              |
| P43 F4  |   | x |   | <i>paaF</i> | GO:0006635 - fatty acid beta-oxidation<br>GO:0008152 - metabolic process<br>GO:0010124 - phenylacetate catabolic process<br>GO:0006631 - fatty acid metabolic process<br>GO:0006629 - lipid metabolic process                                                               |
| P43 F11 |   | x |   | <i>flgA</i> | GO:0071973 - bacterial-type flagellum-dependent cell motility<br>GO:0044781 - bacterial-type flagellum organization                                                                                                                                                         |
| P43 G3  | x |   |   | <i>moaD</i> | GO:0006777 - Mo-molybdopterin cofactor biosynthetic process                                                                                                                                                                                                                 |
| P43 G4  | x |   |   | <i>paaG</i> | GO:0008152 - metabolic process<br>GO:0010124 - phenylacetate catabolic process                                                                                                                                                                                              |
| P43 G10 |   | x |   | <i>ybgP</i> | GO:0061077 - chaperone-mediated protein folding<br>GO:0071555 - cell wall organization<br>GO:0043711 - pilus organization<br>GO:0006457 - protein folding                                                                                                                   |
| P43 G12 |   | x |   | <i>flgK</i> | GO:0071973 - bacterial-type flagellum-dependent cell motility<br>GO:0044780 - bacterial-type flagellum assembly                                                                                                                                                             |
| P43 H7  | x |   |   | <i>gshB</i> | GO:0006750 - glutathione biosynthetic process                                                                                                                                                                                                                               |
| P43 H8  | x |   |   | <i>menA</i> | GO:0009234 - menaquinone biosynthetic process                                                                                                                                                                                                                               |
| P45 A5  |   |   | x | <i>yral</i> | GO:0061077 - chaperone-mediated protein folding<br>GO:0071555 - cell wall organization<br>GO:0006457 - protein folding<br>GO:0043711 - pilus organization                                                                                                                   |
| P45 A8  |   |   | x | <i>fimA</i> | GO:0007155 - cell adhesion                                                                                                                                                                                                                                                  |
| P45 A11 |   |   | x | <i>cheW</i> | GO:0051649 - establishment of localization in cell<br>GO:0007165 - signal transduction<br>GO:0006935 - chemotaxis                                                                                                                                                           |

|         |   |   |   |             |                                                                                                                                                                                                                                                                                                                                                                                                                          |
|---------|---|---|---|-------------|--------------------------------------------------------------------------------------------------------------------------------------------------------------------------------------------------------------------------------------------------------------------------------------------------------------------------------------------------------------------------------------------------------------------------|
| P45 B9  |   |   | x | <i>ahpC</i> | GO:0045454 - cell redox homeostasis<br>GO:0098869 - cellular oxidant detoxification<br>GO:0033214 - iron assimilation by chelation and transport<br>GO:0006979 - response to oxidative stress<br>GO:0009970 - cellular response to sulfate starvation<br>GO:0033194 - response to hydroperoxide<br>GO:0033195 - response to alkyl hydroperoxide<br>GO:0055114 - oxidation-reduction process                              |
| P45 B10 |   | x |   | <i>trg</i>  | GO:0007165 - signal transduction<br>GO:0006935 - chemotaxis                                                                                                                                                                                                                                                                                                                                                              |
| P45 B11 |   | x |   | <i>motB</i> | GO:0097588 - archaeal or bacterial-type flagellum-dependent cell motility<br>GO:0006935 - chemotaxis                                                                                                                                                                                                                                                                                                                     |
| P45 C11 |   |   | x | <i>motA</i> | GO:0071978 - bacterial-type flagellum-dependent swarming motility<br>GO:0071973 - bacterial-type flagellum-dependent cell motility<br>GO:0015031 - protein transport<br>GO:0097588 - archaeal or bacterial-type flagellum-dependent cell motility<br>GO:0015992 - proton transport<br>GO:0006935 - chemotaxis<br>GO:0006811 - ion transport<br>GO:0006810 - transport                                                    |
| P45 D3  |   | x |   | <i>fljL</i> | GO:0071978 - bacterial-type flagellum-dependent swarming motility<br>GO:0071973 - bacterial-type flagellum-dependent cell motility<br>GO:0097588 - archaeal or bacterial-type flagellum-dependent cell motility<br>GO:0006935 - chemotaxis                                                                                                                                                                               |
| P45 D7  |   | x |   | <i>rffM</i> | GO:0009058 - biosynthetic process<br>GO:0009246 - enterobacterial common antigen biosynthetic process                                                                                                                                                                                                                                                                                                                    |
| P45 D12 |   | x |   | <i>secG</i> | GO:0006886 - intracellular protein transport<br>GO:0032978 - protein insertion into membrane from inner side<br>GO:0006616 - SRP-dependent cotranslational protein targeting to membrane, translocation<br>GO:0015031 - protein transport<br>GO:0006810 - transport<br>GO:0009306 - protein secretion<br>GO:0043952 - protein transport by the Sec complex<br>GO:0065002 - intracellular protein transmembrane transport |
| P45 F5  |   |   | x | <i>rfaY</i> | GO:0009244 - lipopolysaccharide core region biosynthetic process<br>GO:0016310 - phosphorylation<br>GO:0009103 - lipopolysaccharide biosynthetic process                                                                                                                                                                                                                                                                 |
| P45 G11 |   |   | x | <i>hscA</i> | GO:0097428 - protein maturation by iron-sulfur cluster transfer<br>GO:0006457 - protein folding<br>GO:0070417 - cellular response to cold<br>GO:0016226 - iron-sulfur cluster assembly                                                                                                                                                                                                                                   |
| P45 H8  | x |   |   | <i>betB</i> | GO:0008152 - metabolic process<br>GO:0051289 - protein homotetramerization<br>GO:0055114 - oxidation-reduction process<br>GO:0019285 - glycine betaine biosynthetic process from choline<br>GO:0006970 - response to osmotic stress                                                                                                                                                                                      |
| P45 H11 |   |   | x | <i>proX</i> | GO:0006972 - hyperosmotic response<br>GO:0031460 - glycine betaine transport<br>GO:0006865 - amino acid transport<br>GO:0006810 - transport                                                                                                                                                                                                                                                                              |
| P47 A6  | x |   |   | <i>rfbD</i> | GO:0019305 - dTDP-rhamnose biosynthetic process<br>GO:0055114 - oxidation-reduction process<br>GO:0045226 - extracellular polysaccharide biosynthetic process<br>GO:0009103 - lipopolysaccharide biosynthetic process<br>GO:0009243 - O antigen biosynthetic process                                                                                                                                                     |
| P47 B4  |   |   | x | <i>putA</i> | GO:0045892 - negative regulation of transcription, DNA-templated<br>GO:0008152 - metabolic process<br>GO:0006560 - proline metabolic process<br>GO:0006561 - proline biosynthetic process<br>GO:0006355 - regulation of transcription, DNA-templated<br>GO:0010133 - proline catabolic process to glutamate<br>GO:0055114 - oxidation-reduction process<br>GO:0006351 - transcription, DNA-templated                     |
| P47 B7  | x |   |   | <i>hcaB</i> | GO:0008152 - metabolic process<br>GO:0055114 - oxidation-reduction process<br>GO:0019439 - aromatic compound catabolic process<br>GO:0019380 - 3-phenylpropionate catabolic process                                                                                                                                                                                                                                      |
| P47 B11 |   |   | x | <i>pldB</i> | GO:0006629 - lipid metabolic process                                                                                                                                                                                                                                                                                                                                                                                     |

|         |   |   |   |             |                                                                                                                                                                                                                                                                                                                                                                                                |
|---------|---|---|---|-------------|------------------------------------------------------------------------------------------------------------------------------------------------------------------------------------------------------------------------------------------------------------------------------------------------------------------------------------------------------------------------------------------------|
| P47 C11 |   |   | x | <i>metF</i> | GO:0006730 - one-carbon metabolic process<br>GO:0051289 - protein homotetramerization<br>GO:0046654 - tetrahydrofolate biosynthetic process<br>GO:0006555 - methionine metabolic process<br>GO:0035999 - tetrahydrofolate interconversion<br>GO:0055114 - oxidation-reduction process<br>GO:0009086 - methionine biosynthetic process<br>GO:0008652 - cellular amino acid biosynthetic process |
| P47 E7  | x |   |   | <i>cysN</i> | GO:0000103 - sulfate assimilation<br>GO:0070814 - hydrogen sulfide biosynthetic process<br>GO:0006790 - sulfur compound metabolic process                                                                                                                                                                                                                                                      |
| P47 E8  | x |   |   | <i>gcvP</i> | GO:0019464 - glycine decarboxylation via glycine cleavage system<br>GO:0006546 - glycine catabolic process<br>GO:0006544 - glycine metabolic process<br>GO:0055114 - oxidation-reduction process                                                                                                                                                                                               |
| P47 E12 |   | x |   | <i>treC</i> | GO:0008152 - metabolic process<br>GO:0005975 - carbohydrate metabolic process<br>GO:0006974 - cellular response to DNA damage stimulus<br>GO:0005993 - trehalose catabolic process                                                                                                                                                                                                             |
| P47 H5  |   | x |   | <i>rfbA</i> | GO:0045226 - extracellular polysaccharide biosynthetic process<br>GO:0009058 - biosynthetic process<br>GO:0019305 - dTDP-rhamnose biosynthetic process<br>GO:0009103 - lipopolysaccharide biosynthetic process<br>GO:0009243 - O antigen biosynthetic process                                                                                                                                  |
| P47 H6  | x |   |   | <i>dsdA</i> | GO:0070179 - D-serine biosynthetic process<br>GO:0006563 - L-serine metabolic process<br>GO:0070178 - D-serine metabolic process<br>GO:0046416 - D-amino acid metabolic process<br>GO:0006520 - cellular amino acid metabolic process<br>GO:0006974 - cellular response to DNA damage stimulus<br>GO:0036088 - D-serine catabolic process<br>GO:0051410 - detoxification of nitrogen compound  |
| P47 H7  |   | x |   | <i>cysI</i> | GO:0019419 - sulfate reduction<br>GO:0000103 - sulfate assimilation<br>GO:0070814 - hydrogen sulfide biosynthetic process<br>GO:0055114 - oxidation-reduction process<br>GO:0019344 - cysteine biosynthetic process<br>GO:0008652 - cellular amino acid biosynthetic process                                                                                                                   |
| P47 H8  | x |   |   | <i>speA</i> | GO:0033388 - putrescine biosynthetic process from arginine<br>GO:0006596 - polyamine biosynthetic process<br>GO:0009446 - putrescine biosynthetic process<br>GO:0008295 - spermidine biosynthetic process<br>GO:0006527 - arginine catabolic process                                                                                                                                           |
| P47 H12 |   | x |   | <i>idnD</i> | GO:0055114 - oxidation-reduction process<br>GO:0019521 - D-gluconate metabolic process<br>GO:0046183 - L-idenate catabolic process                                                                                                                                                                                                                                                             |
| P49 B3  |   |   | x | <i>atoB</i> | GO:0006635 - fatty acid beta-oxidation<br>GO:0051289 - protein homotetramerization<br>GO:0043442 - acetoacetic acid catabolic process<br>GO:0008152 - metabolic process<br>GO:0006631 - fatty acid metabolic process<br>GO:0006629 - lipid metabolic process                                                                                                                                   |
| P49 D5  |   | x |   | <i>gpt</i>  | GO:0009116 - nucleoside metabolic process<br>GO:0006166 - purine ribonucleoside salvage<br>GO:0032263 - GMP salvage<br>GO:0032264 - IMP salvage<br>GO:0032265 - XMP salvage                                                                                                                                                                                                                    |
| P49 E6  |   |   | x | <i>rnk</i>  | GO:0032784 - regulation of DNA-templated transcription, elongation<br>GO:0065007 - biological regulation                                                                                                                                                                                                                                                                                       |
| P49 F5  |   | x |   | <i>sbcD</i> | GO:0006281 - DNA repair<br>GO:0090305 - nucleic acid phosphodiester bond hydrolysis<br>GO:0006310 - DNA recombination<br>GO:0006260 - DNA replication<br>GO:0006259 - DNA metabolic process                                                                                                                                                                                                    |
| P49 F11 |   |   | x | <i>torA</i> | GO:0055114 - oxidation-reduction process<br>GO:0009060 - aerobic respiration<br>GO:0009061 - anaerobic respiration                                                                                                                                                                                                                                                                             |
| P49 F12 |   |   | x | <i>ydcW</i> | GO:0008152 - metabolic process<br>GO:0055114 - oxidation-reduction process<br>GO:0009447 - putrescine catabolic process                                                                                                                                                                                                                                                                        |

|         |   |   |   |             |                                                                                                                                                                                                                                                                                                                                                                                                                                                                                                                                                                                                                                                                                                                                                                                                                                                                                                                             |
|---------|---|---|---|-------------|-----------------------------------------------------------------------------------------------------------------------------------------------------------------------------------------------------------------------------------------------------------------------------------------------------------------------------------------------------------------------------------------------------------------------------------------------------------------------------------------------------------------------------------------------------------------------------------------------------------------------------------------------------------------------------------------------------------------------------------------------------------------------------------------------------------------------------------------------------------------------------------------------------------------------------|
| P49 G11 |   |   | x | <i>grxB</i> | GO:0006749 - glutathione metabolic process<br>GO:0055114 - oxidation-reduction process<br>GO:0045454 - cell redox homeostasis                                                                                                                                                                                                                                                                                                                                                                                                                                                                                                                                                                                                                                                                                                                                                                                               |
| P49 H12 | x |   |   | <i>narW</i> | GO:0051131 - chaperone-mediated protein complex assembly<br>GO:0042128 - nitrate assimilation                                                                                                                                                                                                                                                                                                                                                                                                                                                                                                                                                                                                                                                                                                                                                                                                                               |
| P51 B5  | x |   |   | <i>napF</i> | GO:0055114 - oxidation-reduction process<br>GO:0006979 - response to oxidative stress                                                                                                                                                                                                                                                                                                                                                                                                                                                                                                                                                                                                                                                                                                                                                                                                                                       |
| P51 D10 | x |   |   | <i>aroB</i> | GO:0009073 - aromatic amino acid family biosynthetic process<br>GO:0008652 - cellular amino acid biosynthetic process<br>GO:0009423 - chorismate biosynthetic process                                                                                                                                                                                                                                                                                                                                                                                                                                                                                                                                                                                                                                                                                                                                                       |
| P51 E8  |   | x |   | <i>yljK</i> | GO:0008152 - metabolic process                                                                                                                                                                                                                                                                                                                                                                                                                                                                                                                                                                                                                                                                                                                                                                                                                                                                                              |
| P51 F9  |   | x |   | <i>uxaA</i> | GO:0019698 - D-galacturonate catabolic process                                                                                                                                                                                                                                                                                                                                                                                                                                                                                                                                                                                                                                                                                                                                                                                                                                                                              |
| P51 F12 |   | x |   | <i>grxC</i> | GO:0042965 - glutaredoxin biosynthetic process<br>GO:0055114 - oxidation-reduction process<br>GO:0045454 - cell redox homeostasis<br>GO:0009263 - deoxyribonucleotide biosynthetic process                                                                                                                                                                                                                                                                                                                                                                                                                                                                                                                                                                                                                                                                                                                                  |
| P51 G10 |   | x |   | <i>glpE</i> | GO:0006071 - glycerol metabolic process                                                                                                                                                                                                                                                                                                                                                                                                                                                                                                                                                                                                                                                                                                                                                                                                                                                                                     |
| P51 H1  | x |   |   | <i>ynfG</i> | GO:0055114 - oxidation-reduction process                                                                                                                                                                                                                                                                                                                                                                                                                                                                                                                                                                                                                                                                                                                                                                                                                                                                                    |
| P53 B10 |   |   | x | <i>sspB</i> | GO:0045732 - positive regulation of protein catabolic process                                                                                                                                                                                                                                                                                                                                                                                                                                                                                                                                                                                                                                                                                                                                                                                                                                                               |
| P53 C4  |   | x |   | <i>xapB</i> | GO:1901642 - nucleoside transmembrane transport<br>GO:0015863 - xanthosine transport<br>GO:0015858 - nucleoside transport<br>GO:0055086 - nucleobase-containing small molecule metabolic process<br>GO:0006810 - transport                                                                                                                                                                                                                                                                                                                                                                                                                                                                                                                                                                                                                                                                                                  |
| P53 C7  |   | x |   | <i>deoC</i> | GO:0016052 - carbohydrate catabolic process<br>GO:0046386 - deoxyribose phosphate catabolic process<br>GO:0006974 - cellular response to DNA damage stimulus<br>GO:0009264 - deoxyribonucleotide catabolic process<br>GO:0015949 - nucleobase-containing small molecule interconversion                                                                                                                                                                                                                                                                                                                                                                                                                                                                                                                                                                                                                                     |
| P53 E9  | x |   |   | <i>relA</i> | GO:0042594 - response to starvation<br>GO:0008152 - metabolic process<br>GO:0015970 - guanosine tetraphosphate biosynthetic process<br>GO:0016310 - phosphorylation<br>GO:0015969 - guanosine tetraphosphate metabolic process<br>GO:0015949 - nucleobase-containing small molecule interconversion                                                                                                                                                                                                                                                                                                                                                                                                                                                                                                                                                                                                                         |
| P53 E10 |   | x |   | <i>phoU</i> | GO:0055085 - transmembrane transport<br>GO:0044341 - sodium-dependent phosphate transport<br>GO:0035725 - sodium ion transmembrane transport<br>GO:0035435 - phosphate ion transmembrane transport<br>GO:0071467 - cellular response to pH<br>GO:0009405 - pathogenesis<br>GO:2000186 - negative regulation of phosphate transmembrane transport<br>GO:0071236 - cellular response to antibiotic<br>GO:0034605 - cellular response to heat<br>GO:0032413 - negative regulation of ion transmembrane transporter activity<br>GO:0030643 - cellular phosphate ion homeostasis<br>GO:0016036 - cellular response to phosphate starvation<br>GO:0010629 - negative regulation of gene expression<br>GO:0009267 - cellular response to starvation<br>GO:0001558 - regulation of cell growth<br>GO:0045936 - negative regulation of phosphate metabolic process<br>GO:0006817 - phosphate ion transport<br>GO:0006810 - transport |
| P53 G1  | x |   |   | <i>fadB</i> | GO:0009062 - fatty acid catabolic process<br>GO:0006635 - fatty acid beta-oxidation<br>GO:0055114 - oxidation-reduction process<br>GO:0016042 - lipid catabolic process<br>GO:0008152 - metabolic process<br>GO:0006631 - fatty acid metabolic process<br>GO:0006629 - lipid metabolic process                                                                                                                                                                                                                                                                                                                                                                                                                                                                                                                                                                                                                              |
| P53 G4  | x |   |   | <i>xseA</i> | GO:0090305 - nucleic acid phosphodiester bond hydrolysis<br>GO:0006308 - DNA catabolic process                                                                                                                                                                                                                                                                                                                                                                                                                                                                                                                                                                                                                                                                                                                                                                                                                              |
| P53 G5  |   | x |   | <i>recJ</i> | GO:0090305 - nucleic acid phosphodiester bond hydrolysis<br>GO:0006310 - DNA recombination<br>GO:0006281 - DNA repair                                                                                                                                                                                                                                                                                                                                                                                                                                                                                                                                                                                                                                                                                                                                                                                                       |
| P53 G7  |   | x |   | <i>glnK</i> | GO:0050790 - regulation of catalytic activity<br>GO:0006808 - regulation of nitrogen utilization<br>GO:0006355 - regulation of transcription, DNA-templated<br>GO:0045848 - positive regulation of nitrogen utilization<br>GO:0006351 - transcription, DNA-templated                                                                                                                                                                                                                                                                                                                                                                                                                                                                                                                                                                                                                                                        |



|         |   |   |   |             |                                                                                                                                                                                                                                                                                                                                                                                           |
|---------|---|---|---|-------------|-------------------------------------------------------------------------------------------------------------------------------------------------------------------------------------------------------------------------------------------------------------------------------------------------------------------------------------------------------------------------------------------|
| P53 G8  | x |   |   | <i>feaR</i> | GO:0006355 - regulation of transcription, DNA-templated<br>GO:0006351 - transcription, DNA-templated<br>GO:0045893 - positive regulation of transcription, DNA-templated                                                                                                                                                                                                                  |
| P53 G10 |   |   | x | <i>yjiO</i> | GO:0006355 - regulation of transcription, DNA-templated<br>GO:0006351 - transcription, DNA-templated                                                                                                                                                                                                                                                                                      |
| P53 H5  |   | x |   | <i>endA</i> | GO:0090305 - nucleic acid phosphodiester bond hydrolysis<br>GO:0006308 - DNA catabolic process                                                                                                                                                                                                                                                                                            |
| P53 H12 |   | x |   | <i>pnuC</i> | GO:0006810 - transport<br>GO:0034258 - nicotinamide riboside transport                                                                                                                                                                                                                                                                                                                    |
| P55 A1  |   | x |   | <i>modE</i> | GO:0055085 - transmembrane transport<br>GO:0015689 - molybdate ion transport<br>GO:0006355 - regulation of transcription, DNA-templated<br>GO:0006810 - transport<br>GO:0006351 - transcription, DNA-templated                                                                                                                                                                            |
| P55 A2  |   | x |   | <i>yliC</i> | GO:0006810 - transport<br>GO:0034775 - glutathione transmembrane transport                                                                                                                                                                                                                                                                                                                |
| P55 A4  |   | x |   | <i>potC</i> | GO:1902047 - polyamine transmembrane transport<br>GO:0006810 - transport<br>GO:0015846 - polyamine transport                                                                                                                                                                                                                                                                              |
| P55 B2  |   | x |   | <i>cmr</i>  | GO:0071805 - potassium ion transmembrane transport<br>GO:0035725 - sodium ion transmembrane transport<br>GO:0030641 - regulation of cellular pH<br>GO:0006855 - drug transmembrane transport<br>GO:0055085 - transmembrane transport<br>GO:0046677 - response to antibiotic<br>GO:0006810 - transport                                                                                     |
| P55 B10 |   | x |   | <i>mgIC</i> | GO:0015765 - methylgalactoside transport<br>GO:0015757 - galactose transport<br>GO:0015749 - monosaccharide transport<br>GO:0006974 - cellular response to DNA damage stimulus<br>GO:0008643 - carbohydrate transport<br>GO:0006810 - transport                                                                                                                                           |
| P55 C8  |   | x |   | <i>ydjE</i> | GO:0055085 - transmembrane transport<br>GO:0006810 - transport                                                                                                                                                                                                                                                                                                                            |
| P55 D1  |   | x |   | <i>ybhL</i> |                                                                                                                                                                                                                                                                                                                                                                                           |
| P55 D8  |   | x |   | <i>manX</i> | GO:0034219 - carbohydrate transmembrane transport<br>GO:0061490 - glucose import into cell<br>GO:0015761 - mannose transport<br>GO:0032445 - fructose import<br>GO:0015764 - N-acetylglucosamine transport<br>GO:0008643 - carbohydrate transport<br>GO:0006810 - transport<br>GO:0016310 - phosphorylation<br>GO:0009401 - phosphoenolpyruvate-dependent sugar phosphotransferase system |
| P55 E7  |   |   | x | <i>btuE</i> | GO:0098869 - cellular oxidant detoxification<br>GO:0006979 - response to oxidative stress<br>GO:0033194 - response to hydroperoxide<br>GO:0055114 - oxidation-reduction process                                                                                                                                                                                                           |
| P55 F2  |   | x |   | <i>artQ</i> | GO:1902765 - L-arginine import into cell<br>GO:0006865 - amino acid transport<br>GO:0006810 - transport                                                                                                                                                                                                                                                                                   |
| P55 G10 |   | x |   | <i>glvB</i> | GO:0034219 - carbohydrate transmembrane transport<br>GO:0016310 - phosphorylation<br>GO:0008643 - carbohydrate transport<br>GO:0006810 - transport<br>GO:0009401 - phosphoenolpyruvate-dependent sugar phosphotransferase system                                                                                                                                                          |
| P55 H1  |   |   | x | <i>ybiT</i> | GO:0008152 - metabolic process<br>GO:0009409 - response to cold<br>GO:0006810 - transport                                                                                                                                                                                                                                                                                                 |
| P55 H3  |   |   | x | <i>potD</i> | GO:1902047 - polyamine transmembrane transport<br>GO:0006810 - transport<br>GO:0015846 - polyamine transport                                                                                                                                                                                                                                                                              |
| P55 H4  | x |   |   | <i>sapD</i> | GO:0008152 - metabolic process<br>GO:0071805 - potassium ion transmembrane transport<br>GO:0015833 - peptide transport<br>GO:0015031 - protein transport<br>GO:0006810 - transport                                                                                                                                                                                                        |

|         |   |   |   |             |                                                                                                                                                                                                                                                                                                                             |
|---------|---|---|---|-------------|-----------------------------------------------------------------------------------------------------------------------------------------------------------------------------------------------------------------------------------------------------------------------------------------------------------------------------|
| P57 C1  |   | x |   | <i>malK</i> | GO:0055085 - transmembrane transport<br>GO:0008152 - metabolic process<br>GO:0008643 - carbohydrate transport<br>GO:0006810 - transport<br>GO:0015768 - maltose transport<br>GO:0042956 - maltodextrin transport                                                                                                            |
| P57 C5  |   |   | x | <i>rpmF</i> | GO:0006412 - translation                                                                                                                                                                                                                                                                                                    |
| P57 D6  | x |   |   | <i>hyfB</i> | GO:0042773 - ATP synthesis coupled electron transport<br>GO:0055114 - oxidation-reduction process                                                                                                                                                                                                                           |
| P57 D7  |   | x |   | <i>fruB</i> | GO:0032445 - fructose import<br>GO:0016310 - phosphorylation<br>GO:0008643 - carbohydrate transport<br>GO:0006810 - transport<br>GO:0009401 - phosphoenolpyruvate-dependent sugar phosphotransferase system                                                                                                                 |
| P57 D10 | x |   |   | <i>proW</i> | GO:0006972 - hyperosmotic response<br>GO:0031460 - glycine betaine transport<br>GO:0015871 - choline transport<br>GO:0006865 - amino acid transport<br>GO:0006810 - transport                                                                                                                                               |
| P57 D11 | x |   |   | <i>yqeG</i> | GO:0003333 - amino acid transmembrane transport<br>GO:0006810 - transport                                                                                                                                                                                                                                                   |
| P57 E9  |   | x |   | <i>focB</i> | GO:0015724 - formate transport<br>GO:0006810 - transport                                                                                                                                                                                                                                                                    |
| P57 F5  | x |   |   | <i>rpmI</i> | GO:0006412 - translation                                                                                                                                                                                                                                                                                                    |
| P57 F9  | x |   |   | <i>yfgO</i> | GO:0055085 - transmembrane transport<br>GO:0006810 - transport                                                                                                                                                                                                                                                              |
| P57 F11 | x |   |   | <i>cmtA</i> | GO:0034219 - carbohydrate transmembrane transport<br>GO:0015797 - mannitol transport<br>GO:0016310 - phosphorylation<br>GO:0008643 - carbohydrate transport<br>GO:0006810 - transport<br>GO:0009401 - phosphoenolpyruvate-dependent sugar phosphotransferase system                                                         |
| P57 F12 | x |   |   | <i>kbaY</i> | GO:0051289 - protein homotetramerization<br>GO:0005975 - carbohydrate metabolic process<br>GO:2001059 - D-tagatose 6-phosphate catabolic process                                                                                                                                                                            |
| P57 G2  |   | x |   | <i>treB</i> | GO:0043610 - regulation of carbohydrate utilization<br>GO:0034219 - carbohydrate transmembrane transport<br>GO:0015771 - trehalose transport<br>GO:0016310 - phosphorylation<br>GO:0008643 - carbohydrate transport<br>GO:0006810 - transport<br>GO:0009401 - phosphoenolpyruvate-dependent sugar phosphotransferase system |
| P57 G3  |   | x |   | <i>creD</i> |                                                                                                                                                                                                                                                                                                                             |
| P57 G4  | x |   |   | <i>aat</i>  | GO:0030163 - protein catabolic process                                                                                                                                                                                                                                                                                      |
| P57 G5  | x |   |   | <i>selD</i> | GO:0016260 - selenocysteine biosynthetic process<br>GO:0070329 - tRNA seleno-modification<br>GO:0016310 - phosphorylation                                                                                                                                                                                                   |
| P57 G6  |   | x |   | <i>hyfF</i> | GO:0006974 - cellular response to DNA damage stimulus<br>GO:0055114 - oxidation-reduction process                                                                                                                                                                                                                           |
| P57 G8  |   | x |   | <i>ptsI</i> | GO:0008643 - carbohydrate transport<br>GO:0006810 - transport<br>GO:0016310 - phosphorylation<br>GO:0009401 - phosphoenolpyruvate-dependent sugar phosphotransferase system                                                                                                                                                 |
| P57 G9  | x |   |   | <i>uraA</i> | GO:1903791 - uracil transmembrane transport<br>GO:0006810 - transport<br>GO:0055085 - transmembrane transport<br>GO:0015857 - uracil transport                                                                                                                                                                              |
| P57 H1  | x |   |   | <i>phnC</i> | GO:0015748 - organophosphate ester transport<br>GO:0008152 - metabolic process<br>GO:0015716 - organic phosphonate transport<br>GO:0006810 - transport<br>GO:0042916 - alkylphosphonate transport                                                                                                                           |
| P57 H4  |   | x |   | <i>rmf</i>  | GO:0006417 - regulation of translation<br>GO:0032055 - negative regulation of translation in response to stress<br>GO:0033554 - cellular response to stress                                                                                                                                                                 |

|         |   |   |   |             |                                                                                                                                                                                                                                                                                              |
|---------|---|---|---|-------------|----------------------------------------------------------------------------------------------------------------------------------------------------------------------------------------------------------------------------------------------------------------------------------------------|
| P57 H5  | x |   |   | <i>rrmA</i> | GO:0032259 - methylation<br>GO:0006364 - rRNA processing<br>GO:0070475 - rRNA base methylation                                                                                                                                                                                               |
| P57 H7  |   | x |   | <i>hisJ</i> | GO:1902024 - L-histidine transport<br>GO:0006865 - amino acid transport<br>GO:0006810 - transport                                                                                                                                                                                            |
| P57 H9  | x |   |   | <i>yphD</i> | GO:0015749 - monosaccharide transport<br>GO:0006810 - transport                                                                                                                                                                                                                              |
| P57 H10 |   | x |   | <i>gudP</i> | GO:0006820 - anion transport<br>GO:0055085 - transmembrane transport<br>GO:0006810 - transport                                                                                                                                                                                               |
| P59 B5  |   |   | x | <i>xylF</i> | GO:0008643 - carbohydrate transport<br>GO:0006810 - transport<br>GO:0015752 - D-ribose transport<br>GO:0015753 - D-xylose transport                                                                                                                                                          |
| P59 B6  |   |   | x | <i>tbpA</i> | GO:0071934 - thiamine transmembrane transport<br>GO:0055085 - transmembrane transport<br>GO:0015888 - thiamine transport<br>GO:0006810 - transport                                                                                                                                           |
| P59 B7  |   |   | x | <i>ybbW</i> | GO:0055085 - transmembrane transport<br>GO:0015851 - nucleobase transport<br>GO:0015720 - allantoin transport<br>GO:0006810 - transport<br>GO:0006144 - purine nucleobase metabolic process                                                                                                  |
| P59 H5  |   |   | x | <i>uhpT</i> | GO:0006817 - phosphate ion transport<br>GO:0055085 - transmembrane transport<br>GO:0035435 - phosphate ion transmembrane transport<br>GO:0006810 - transport<br>GO:0008643 - carbohydrate transport<br>GO:0015712 - hexose phosphate transport<br>GO:0015760 - glucose-6-phosphate transport |
| P61 A4  |   |   | x | <i>panF</i> | GO:0071436 - sodium ion export<br>GO:0055085 - transmembrane transport<br>GO:0015887 - pantothenate transmembrane transport<br>GO:0006814 - sodium ion transport<br>GO:0006811 - ion transport<br>GO:0006810 - transport                                                                     |
| P61 A8  |   |   | x | <i>rusA</i> | GO:0090305 - nucleic acid phosphodiester bond hydrolysis<br>GO:0006974 - cellular response to DNA damage stimulus<br>GO:0006310 - DNA recombination<br>GO:0006281 - DNA repair                                                                                                               |
| P61 A10 | x |   |   | <i>ampE</i> |                                                                                                                                                                                                                                                                                              |
| P61 C2  |   | x |   | <i>yggL</i> |                                                                                                                                                                                                                                                                                              |
| P61 C5  |   | x |   | <i>prmA</i> | GO:0032259 - methylation<br>GO:0006479 - protein methylation<br>GO:0018023 - peptidyl-lysine trimethylation<br>GO:0018012 - N-terminal peptidyl-alanine trimethylation                                                                                                                       |
| P61 C6  |   | x |   | <i>dtd</i>  | GO:0006450 - regulation of translational fidelity<br>GO:0009408 - response to heat<br>GO:0019478 - D-amino acid catabolic process<br>GO:0006399 - tRNA metabolic process                                                                                                                     |
| P61 C9  |   | x |   | <i>rho</i>  | GO:0006355 - regulation of transcription, DNA-templated<br>GO:0006353 - DNA-templated transcription, termination<br>GO:0006351 - transcription, DNA-templated                                                                                                                                |
| P61 D8  |   | x |   | <i>dgsA</i> | GO:0005975 - carbohydrate metabolic process<br>GO:0006355 - regulation of transcription, DNA-templated<br>GO:0006351 - transcription, DNA-templated                                                                                                                                          |
| P61 D12 |   | x |   | <i>cspD</i> | GO:0006950 - response to stress<br>GO:0006355 - regulation of transcription, DNA-templated<br>GO:0042594 - response to starvation<br>GO:0008156 - negative regulation of DNA replication                                                                                                     |
| P61 E1  |   | x |   | <i>ygcM</i> | GO:0008616 - queuosine biosynthetic process                                                                                                                                                                                                                                                  |
| P61 E4  |   | x |   | <i>friA</i> | GO:1902475 - L-alpha-amino acid transmembrane transport<br>GO:0015807 - L-amino acid transport<br>GO:0003333 - amino acid transmembrane transport<br>GO:0030393 - fructoselysine metabolic process<br>GO:0006865 - amino acid transport<br>GO:0006810 - transport                            |
| P61 E8  |   | x |   | <i>yegW</i> | GO:0006355 - regulation of transcription, DNA-templated<br>GO:0006351 - transcription, DNA-templated                                                                                                                                                                                         |
| P61 E11 |   | x |   | <i>borD</i> | GO:0071286 - cellular response to magnesium ion                                                                                                                                                                                                                                              |

|         |   |   |   |             |                                                                                                                                                                                                                                                                                                                                                                                |
|---------|---|---|---|-------------|--------------------------------------------------------------------------------------------------------------------------------------------------------------------------------------------------------------------------------------------------------------------------------------------------------------------------------------------------------------------------------|
| P61 F3  | x |   |   | <i>elbB</i> | GO:0045828 - positive regulation of isoprenoid metabolic process<br>GO:0008299 - isoprenoid biosynthetic process                                                                                                                                                                                                                                                               |
| P61 F6  |   | x |   | <i>rplK</i> | GO:0000027 - ribosomal large subunit assembly<br>GO:0006412 - translation<br>GO:0015968 - stringent response<br>GO:0006415 - translational termination                                                                                                                                                                                                                         |
| P61 F10 |   | x |   | <i>ampG</i> | GO:0006810 - transport<br>GO:0055085 - transmembrane transport<br>GO:0015835 - peptidoglycan transport<br>GO:0000270 - peptidoglycan metabolic process                                                                                                                                                                                                                         |
| P61 F11 |   | x |   | <i>nfrB</i> | GO:0006810 - transport                                                                                                                                                                                                                                                                                                                                                         |
| P61 G10 |   | x |   | <i>ybaA</i> |                                                                                                                                                                                                                                                                                                                                                                                |
| P61 H8  |   | x |   | <i>cpdA</i> | GO:0042545 - cell wall modification<br>GO:0008152 - metabolic process                                                                                                                                                                                                                                                                                                          |
| P63 B1  |   | x |   | <i>ymlG</i> | GO:0006310 - DNA recombination                                                                                                                                                                                                                                                                                                                                                 |
| P63 C7  |   | x |   | <i>yjiT</i> | GO:0006950 - response to stress                                                                                                                                                                                                                                                                                                                                                |
| P63 D5  |   | x |   | <i>emrA</i> | GO:0055085 - transmembrane transport<br>GO:0006855 - drug transmembrane transport<br>GO:0046677 - response to antibiotic<br>GO:0006810 - transport                                                                                                                                                                                                                             |
| P63 E6  |   | x |   | <i>acpT</i> | GO:0019878 - lysine biosynthetic process via aminoadipic acid<br>GO:0018070 - peptidyl-serine phosphopantetheinylation<br>GO:0006633 - fatty acid biosynthetic process                                                                                                                                                                                                         |
| P63 G12 |   |   | x | <i>ulaC</i> | GO:0034219 - carbohydrate transmembrane transport<br>GO:0016310 - phosphorylation<br>GO:0006810 - transport<br>GO:0015882 - L-ascorbic acid transport<br>GO:0009401 - phosphoenolpyruvate-dependent sugar phosphotransferase system                                                                                                                                            |
| P63 H9  |   | x |   | <i>hemN</i> | GO:0006782 - protoporphyrinogen IX biosynthetic process<br>GO:0006779 - porphyrin-containing compound biosynthetic process<br>GO:0019353 - protoporphyrinogen IX biosynthetic process from glutamate<br>GO:0055114 - oxidation-reduction process                                                                                                                               |
| P65 E9  |   |   | x | <i>yhiL</i> |                                                                                                                                                                                                                                                                                                                                                                                |
| P65 F8  |   | x |   | <i>gltB</i> | GO:0019676 - ammonia assimilation cycle<br>GO:0008652 - cellular amino acid biosynthetic process<br>GO:0008152 - metabolic process<br>GO:0097054 - L-glutamate biosynthetic process<br>GO:0006807 - nitrogen compound metabolic process<br>GO:0055114 - oxidation-reduction process<br>GO:0006541 - glutamine metabolic process<br>GO:0006537 - glutamate biosynthetic process |
| P65 F11 |   | x |   | <i>dsbA</i> |                                                                                                                                                                                                                                                                                                                                                                                |
| P65 F12 |   | x |   | <i>ytfA</i> |                                                                                                                                                                                                                                                                                                                                                                                |
| P65 G6  |   |   | x | <i>fucK</i> | GO:0046835 - carbohydrate phosphorylation<br>GO:0019317 - fucose catabolic process<br>GO:0006004 - fucose metabolic process<br>GO:0005975 - carbohydrate metabolic process<br>GO:0016310 - phosphorylation<br>GO:0042355 - L-fucose catabolic process<br>GO:0019571 - D-arabinose catabolic process                                                                            |
| P65 G7  |   |   | x | <i>tdcC</i> | GO:0015992 - proton transport<br>GO:0032329 - serine transport<br>GO:0006810 - transport<br>GO:0006865 - amino acid transport<br>GO:0003333 - amino acid transmembrane transport<br>GO:0015825 - L-serine transport<br>GO:0015826 - threonine transport                                                                                                                        |
| P67 A1  |   | x |   | <i>yjgX</i> | GO:0009244 - lipopolysaccharide core region biosynthetic process<br>GO:0008152 - metabolic process                                                                                                                                                                                                                                                                             |
| P67 A8  |   | x |   | <i>mgsA</i> | GO:0019242 - methylglyoxal biosynthetic process                                                                                                                                                                                                                                                                                                                                |
| P67 E9  |   | x |   | <i>sieB</i> |                                                                                                                                                                                                                                                                                                                                                                                |
| P69 B3  |   |   | x | <i>menD</i> | GO:0009234 - menaquinone biosynthetic process                                                                                                                                                                                                                                                                                                                                  |
| P69 B5  | x |   |   | <i>amiC</i> | GO:0051301 - cell division<br>GO:0071555 - cell wall organization<br>GO:0043093 - FtsZ-dependent cytokinesis<br>GO:0009253 - peptidoglycan catabolic process                                                                                                                                                                                                                   |
| P69 B8  | x |   |   | <i>yghX</i> | GO:0008152 - metabolic process                                                                                                                                                                                                                                                                                                                                                 |

|         |   |   |   |             |                                                                                                                                                                                                                                                                                                                                                                                                                                                                                                             |
|---------|---|---|---|-------------|-------------------------------------------------------------------------------------------------------------------------------------------------------------------------------------------------------------------------------------------------------------------------------------------------------------------------------------------------------------------------------------------------------------------------------------------------------------------------------------------------------------|
| P69 B12 |   |   | x | <i>kdgT</i> | GO:0015992 - proton transport<br>GO:0008643 - carbohydrate transport<br>GO:0006810 - transport<br>GO:0046411 - 2-keto-3-deoxygluconate transport<br>GO:0035429 - gluconate transmembrane transport                                                                                                                                                                                                                                                                                                          |
| P69 C3  |   | x |   | <i>torI</i> | GO:0006355 - regulation of transcription, DNA-templated<br>GO:0006351 - transcription, DNA-templated<br>GO:2000143 - negative regulation of DNA-templated transcription, initiation<br>GO:0044349 - DNA excision<br>GO:0006310 - DNA recombination                                                                                                                                                                                                                                                          |
| P69 C6  | x |   |   | <i>ygfU</i> | GO:1903825 - organic acid transmembrane transport<br>GO:0006811 - ion transport<br>GO:0006810 - transport<br>GO:0015992 - proton transport<br>GO:0055085 - transmembrane transport<br>GO:0015747 - urate transport<br>GO:0042906 - xanthine transport                                                                                                                                                                                                                                                       |
| P69 C8  |   | x |   | <i>yghY</i> | GO:0008152 - metabolic process                                                                                                                                                                                                                                                                                                                                                                                                                                                                              |
| P69 D1  |   | x |   | <i>yoeF</i> | GO:0006576 - cellular biogenic amine metabolic process                                                                                                                                                                                                                                                                                                                                                                                                                                                      |
| P69 F1  |   | x |   | <i>yoeB</i> | GO:0098795 - mRNA cleavage involved in gene silencing<br>GO:1903507 - negative regulation of nucleic acid-templated transcription<br>GO:0090502 - RNA phosphodiester bond hydrolysis, endonucleolytic<br>GO:0006402 - mRNA catabolic process<br>GO:0044010 - single-species biofilm formation<br>GO:0045947 - negative regulation of translational initiation<br>GO:0006401 - RNA catabolic process<br>GO:0006355 - regulation of transcription, DNA-templated<br>GO:0006351 - transcription, DNA-templated |
| P69 F2  |   | x |   | <i>bcr</i>  | GO:0015833 - peptide transport<br>GO:0015031 - protein transport<br>GO:0015893 - drug transport<br>GO:0035442 - dipeptide transmembrane transport<br>GO:0006855 - drug transmembrane transport<br>GO:0055085 - transmembrane transport<br>GO:0046677 - response to antibiotic<br>GO:0006810 - transport                                                                                                                                                                                                     |
| P69 F5  |   |   | x | <i>xdhA</i> | GO:0009115 - xanthine catabolic process<br>GO:0009114 - hypoxanthine catabolic process<br>GO:0055114 - oxidation-reduction process<br>GO:0006166 - purine ribonucleoside salvage<br>GO:0006144 - purine nucleobase metabolic process                                                                                                                                                                                                                                                                        |
| P69 G10 | x |   |   | <i>yhdJ</i> | GO:0032775 - DNA methylation on adenine<br>GO:0032259 - methylation<br>GO:0006306 - DNA methylation                                                                                                                                                                                                                                                                                                                                                                                                         |
| P69 H7  |   | x |   | <i>hybF</i> | GO:0006464 - cellular protein modification process<br>GO:0051604 - protein maturation                                                                                                                                                                                                                                                                                                                                                                                                                       |
| P69 H8  | x |   |   | <i>yqiH</i> | GO:0061077 - chaperone-mediated protein folding<br>GO:0071555 - cell wall organization<br>GO:0043711 - pilus organization<br>GO:0006974 - cellular response to DNA damage stimulus                                                                                                                                                                                                                                                                                                                          |
| P69 H10 |   | x |   | <i>yhdX</i> | GO:0006865 - amino acid transport<br>GO:0006810 - transport                                                                                                                                                                                                                                                                                                                                                                                                                                                 |
| P69 H11 |   | x |   | <i>ptsA</i> | GO:0016310 - phosphorylation<br>GO:0009401 - phosphoenolpyruvate-dependent sugar phosphotransferase system<br>GO:0008643 - carbohydrate transport<br>GO:0006810 - transport                                                                                                                                                                                                                                                                                                                                 |
| P71 A4  |   |   | x | <i>yicO</i> | GO:1904823 - purine nucleobase transmembrane transport<br>GO:0006863 - purine nucleobase transport<br>GO:0015853 - adenine transport<br>GO:0055085 - transmembrane transport<br>GO:0006810 - transport                                                                                                                                                                                                                                                                                                      |
| P71 A8  |   |   | x | <i>yhhT</i> | GO:0055085 - transmembrane transport                                                                                                                                                                                                                                                                                                                                                                                                                                                                        |
| P71 B9  |   | x |   | <i>yhfY</i> | GO:0006355 - regulation of transcription, DNA-templated                                                                                                                                                                                                                                                                                                                                                                                                                                                     |
| P71 C5  |   |   | x | <i>yiaB</i> | GO:0006974 - cellular response to DNA damage stimulus                                                                                                                                                                                                                                                                                                                                                                                                                                                       |
| P71 F10 |   |   | x | <i>ubiC</i> | GO:0042866 - pyruvate biosynthetic process<br>GO:0006744 - ubiquinone biosynthetic process                                                                                                                                                                                                                                                                                                                                                                                                                  |
| P73 A11 |   |   | x | <i>yadD</i> |                                                                                                                                                                                                                                                                                                                                                                                                                                                                                                             |
| P73 B4  |   |   | x | <i>fimI</i> | GO:0007155 - cell adhesion<br>GO:0009297 - pilus assembly                                                                                                                                                                                                                                                                                                                                                                                                                                                   |
| P73 D7  | x |   |   | <i>ygiQ</i> | GO:0008152 - metabolic process                                                                                                                                                                                                                                                                                                                                                                                                                                                                              |

|         |   |   |   |             |                                                                                                                                                                                                                                                                                                                                                                                                             |
|---------|---|---|---|-------------|-------------------------------------------------------------------------------------------------------------------------------------------------------------------------------------------------------------------------------------------------------------------------------------------------------------------------------------------------------------------------------------------------------------|
| P73 D8  | x |   |   | <i>rhtB</i> | GO:0006865 - amino acid transport<br>GO:0006810 - transport<br>GO:0042968 - homoserine transport                                                                                                                                                                                                                                                                                                            |
| P75 B4  |   | x |   | <i>ybgQ</i> | GO:0055085 - transmembrane transport<br>GO:0009297 - pilus assembly<br>GO:0006810 - transport                                                                                                                                                                                                                                                                                                               |
| P75 B10 |   |   | x | <i>yciO</i> |                                                                                                                                                                                                                                                                                                                                                                                                             |
| P75 C1  | x |   |   | <i>yahM</i> |                                                                                                                                                                                                                                                                                                                                                                                                             |
| P75 C4  |   | x |   | <i>ybhT</i> | GO:0006855 - drug transmembrane transport<br>GO:0046677 - response to antibiotic<br>GO:0006810 - transport<br>GO:0036460 - cellular response to cell envelope stress                                                                                                                                                                                                                                        |
| P75 C9  |   |   | x | <i>ycgH</i> |                                                                                                                                                                                                                                                                                                                                                                                                             |
| P75 E8  |   | x |   | <i>ymfE</i> |                                                                                                                                                                                                                                                                                                                                                                                                             |
| P75 E9  | x |   |   | <i>ycgN</i> |                                                                                                                                                                                                                                                                                                                                                                                                             |
| P75 E12 | x |   |   | <i>ycdO</i> | GO:0042919 - benzoate transport<br>GO:0055085 - transmembrane transport                                                                                                                                                                                                                                                                                                                                     |
| P75 G4  |   | x |   | <i>ybiO</i> | GO:0006811 - ion transport<br>GO:0006810 - transport<br>GO:0055085 - transmembrane transport<br>GO:0071470 - cellular response to osmotic stress                                                                                                                                                                                                                                                            |
| P75 G8  |   | x |   | <i>ymfT</i> |                                                                                                                                                                                                                                                                                                                                                                                                             |
| P77 B10 |   |   | x | <i>yfbE</i> | GO:0046493 - lipid A metabolic process<br>GO:0006629 - lipid metabolic process<br>GO:0046677 - response to antibiotic<br>GO:0009103 - lipopolysaccharide biosynthetic process<br>GO:0009245 - lipid A biosynthetic process                                                                                                                                                                                  |
| P77 E8  |   | x |   | <i>yohN</i> | GO:1901652 - response to peptide<br>GO:0006974 - cellular response to DNA damage stimulus<br>GO:0010045 - response to nickel cation<br>GO:0032025 - response to cobalt ion                                                                                                                                                                                                                                  |
| P79 B5  |   | x |   | <i>nadR</i> | GO:0045892 - negative regulation of transcription, DNA-templated<br>GO:0009058 - biosynthetic process<br>GO:0006810 - transport<br>GO:0009435 - NAD biosynthetic process<br>GO:0016310 - phosphorylation<br>GO:0008152 - metabolic process<br>GO:0006355 - regulation of transcription, DNA-templated<br>GO:0019363 - pyridine nucleotide biosynthetic process<br>GO:0006351 - transcription, DNA-templated |
| P79 C9  |   | x |   | <i>modA</i> | GO:0015689 - molybdate ion transport<br>GO:0006810 - transport                                                                                                                                                                                                                                                                                                                                              |
| P79 D1  |   |   | x | <i>yqaC</i> | GO:0005975 - carbohydrate metabolic process                                                                                                                                                                                                                                                                                                                                                                 |
| P79 D6  |   | x |   | <i>ybfO</i> | GO:0097264 - self proteolysis                                                                                                                                                                                                                                                                                                                                                                               |
| P79 D9  | x |   |   | <i>malT</i> | GO:0045913 - positive regulation of carbohydrate metabolic process<br>GO:0045893 - positive regulation of transcription, DNA-templated<br>GO:0006355 - regulation of transcription, DNA-templated<br>GO:0006351 - transcription, DNA-templated<br>GO:0005975 - carbohydrate metabolic process                                                                                                               |
| P79 E5  |   | x |   | <i>ybhR</i> | GO:0006855 - drug transmembrane transport<br>GO:0055085 - transmembrane transport<br>GO:0006974 - cellular response to DNA damage stimulus<br>GO:0006810 - transport                                                                                                                                                                                                                                        |
| P79 F9  |   | x |   | <i>ydhB</i> | GO:0006355 - regulation of transcription, DNA-templated<br>GO:0006351 - transcription, DNA-templated                                                                                                                                                                                                                                                                                                        |
| P79 F12 |   | x |   | <i>mutS</i> | GO:0006281 - DNA repair<br>GO:0006974 - cellular response to DNA damage stimulus<br>GO:0000018 - regulation of DNA recombination<br>GO:0006298 - mismatch repair                                                                                                                                                                                                                                            |
| P79 G6  |   | x |   | <i>rhdD</i> | GO:0097264 - self proteolysis<br>GO:0010438 - cellular response to sulfur starvation                                                                                                                                                                                                                                                                                                                        |
| P79 G9  | x |   |   | <i>rtcB</i> | GO:0006974 - cellular response to DNA damage stimulus<br>GO:0006281 - DNA repair<br>GO:0006266 - DNA ligation<br>GO:0006396 - RNA processing<br>GO:0042245 - RNA repair                                                                                                                                                                                                                                     |
| P79 G10 | x |   |   | <i>rspB</i> | GO:0055114 - oxidation-reduction process                                                                                                                                                                                                                                                                                                                                                                    |

|         |   |   |   |             |                                                                                                                                                                                                                                                                                 |
|---------|---|---|---|-------------|---------------------------------------------------------------------------------------------------------------------------------------------------------------------------------------------------------------------------------------------------------------------------------|
| P79 G12 |   | x |   | <i>mutH</i> | GO:0090305 - nucleic acid phosphodiester bond hydrolysis<br>GO:0006974 - cellular response to DNA damage stimulus<br>GO:0006281 - DNA repair<br>GO:0006304 - DNA modification<br>GO:0000018 - regulation of DNA recombination<br>GO:0006298 - mismatch repair                   |
| P81 A1  |   |   | x | <i>mutY</i> | GO:0008152 - metabolic process<br>GO:0006974 - cellular response to DNA damage stimulus<br>GO:0006281 - DNA repair<br>GO:0006284 - base-excision repair                                                                                                                         |
| P81 A2  |   |   | x | <i>gidB</i> | GO:0070476 - rRNA (guanine-N7)-methylation<br>GO:0032259 - methylation<br>GO:0006364 - rRNA processing<br>GO:0070475 - rRNA base methylation                                                                                                                                    |
| P81 F5  |   |   | x | <i>ycfJ</i> | GO:1900190 - regulation of single-species biofilm formation                                                                                                                                                                                                                     |
| P83 A6  |   |   | x | <i>yhgG</i> |                                                                                                                                                                                                                                                                                 |
| P83 A7  |   |   | x | <i>hemY</i> | GO:0042168 - heme metabolic process<br>GO:0006779 - porphyrin-containing compound biosynthetic process                                                                                                                                                                          |
| P83 A11 |   |   | x | <i>gabT</i> | GO:0042450 - arginine biosynthetic process via ornithine<br>GO:0009448 - gamma-aminobutyric acid metabolic process<br>GO:0009450 - gamma-aminobutyric acid catabolic process                                                                                                    |
| P83 B1  |   |   | x | <i>yfeN</i> |                                                                                                                                                                                                                                                                                 |
| P83 B6  |   |   | x | <i>yzgL</i> |                                                                                                                                                                                                                                                                                 |
| P83 H1  |   | x |   | <i>ydfE</i> |                                                                                                                                                                                                                                                                                 |
| P83 H5  | x |   |   | <i>yhfT</i> |                                                                                                                                                                                                                                                                                 |
| P83 H6  | x |   |   | <i>yibl</i> |                                                                                                                                                                                                                                                                                 |
| P83 H9  | x |   |   | <i>ppdA</i> |                                                                                                                                                                                                                                                                                 |
| P83 H12 | x |   |   | <i>glf</i>  | GO:0009103 - lipopolysaccharide biosynthetic process<br>GO:0009243 - O antigen biosynthetic process                                                                                                                                                                             |
| P85 A8  |   | x |   | <i>alsA</i> | GO:0015754 - allose transport<br>GO:0015749 - monosaccharide transport<br>GO:0008152 - metabolic process<br>GO:0008643 - carbohydrate transport<br>GO:0006810 - transport                                                                                                       |
| P85 C6  |   |   | x | <i>yliD</i> | GO:0006810 - transport<br>GO:0034775 - glutathione transmembrane transport                                                                                                                                                                                                      |
| P85 C9  |   |   | x | <i>ssuE</i> | GO:0051289 - protein homotetramerization<br>GO:0006974 - cellular response to DNA damage stimulus<br>GO:0055114 - oxidation-reduction process<br>GO:0046306 - alkanesulfonate catabolic process<br>GO:0009970 - cellular response to sulfate starvation                         |
| P85 C10 |   |   | x | <i>mhpD</i> | GO:0008152 - metabolic process<br>GO:0019380 - 3-phenylpropionate catabolic process<br>GO:0019439 - aromatic compound catabolic process                                                                                                                                         |
| P85 D2  |   |   | x | <i>fucl</i> | GO:0019317 - fucose catabolic process<br>GO:0006004 - fucose metabolic process<br>GO:0005996 - monosaccharide metabolic process<br>GO:0005975 - carbohydrate metabolic process<br>GO:0019571 - D-arabinose catabolic process<br>GO:0042355 - L-fucose catabolic process         |
| P85 E2  |   | x |   | <i>fucl</i> | GO:0042354 - L-fucose metabolic process<br>GO:0005996 - monosaccharide metabolic process<br>GO:0006004 - fucose metabolic process<br>GO:0005975 - carbohydrate metabolic process                                                                                                |
| P85 F6  |   | x |   | <i>yecC</i> | GO:0015830 - diaminopimelate transport<br>GO:1903712 - cysteine transmembrane transport<br>GO:0008152 - metabolic process<br>GO:0003333 - amino acid transmembrane transport<br>GO:0015811 - L-cystine transport<br>GO:0006865 - amino acid transport<br>GO:0006810 - transport |
| P85 F9  |   | x |   | <i>alpA</i> | GO:0006355 - regulation of transcription, DNA-templated<br>GO:0006351 - transcription, DNA-templated<br>GO:0042710 - biofilm formation<br>GO:0045893 - positive regulation of transcription, DNA-templated                                                                      |
| P85 H1  |   | x |   | <i>hypE</i> | GO:0046892 - peptidyl-S-carbamoyl-L-cysteine dehydrator<br>GO:0051604 - protein maturation                                                                                                                                                                                      |

|         |   |   |  |             |                                                                                                                                                                                                                                                                                   |
|---------|---|---|--|-------------|-----------------------------------------------------------------------------------------------------------------------------------------------------------------------------------------------------------------------------------------------------------------------------------|
| P85 H5  | x |   |  | <i>acrA</i> | GO:0015721 - bile acid and bile salt transport<br>GO:0055085 - transmembrane transport<br>GO:0006810 - transport<br>GO:0006855 - drug transmembrane transport<br>GO:0046677 - response to antibiotic                                                                              |
| P87 B2  |   | x |  | <i>yhiM</i> | GO:0071229 - cellular response to acid chemical                                                                                                                                                                                                                                   |
| P87 B5  |   | x |  | <i>ydbJ</i> |                                                                                                                                                                                                                                                                                   |
| P87 B7  |   | x |  | <i>pcnB</i> | GO:0043631 - RNA polyadenylation<br>GO:0006396 - RNA processing<br>GO:0006397 - mRNA processing<br>GO:0006378 - mRNA polyadenylation<br>GO:0006351 - transcription, DNA-templated<br>GO:0006276 - plasmid maintenance<br>GO:0009451 - RNA modification                            |
| P87 C5  | x |   |  | <i>yncH</i> |                                                                                                                                                                                                                                                                                   |
| P87 C9  | x |   |  | <i>asr</i>  | GO:0010447 - response to acidic pH<br>GO:0001101 - response to acid chemical<br>GO:0010043 - response to zinc ion                                                                                                                                                                 |
| P87 D4  | x |   |  | <i>hokE</i> | GO:0006974 - cellular response to DNA damage stimulus                                                                                                                                                                                                                             |
| P87 D11 |   | x |  | <i>ygcS</i> | GO:0015850 - organic hydroxy compound transport<br>GO:0055085 - transmembrane transport<br>GO:0006810 - transport                                                                                                                                                                 |
| P87 E2  |   | x |  | <i>yjdC</i> | GO:0006355 - regulation of transcription, DNA-templated<br>GO:0006351 - transcription, DNA-templated                                                                                                                                                                              |
| P87 E3  |   | x |  | <i>yjjM</i> | GO:0006351 - transcription, DNA-templated<br>GO:0019584 - galactonate catabolic process<br>GO:0006355 - regulation of transcription, DNA-templated                                                                                                                                |
| P87 E6  |   | x |  | <i>ygdI</i> |                                                                                                                                                                                                                                                                                   |
| P87 E8  |   | x |  | <i>ycfS</i> | GO:0071555 - cell wall organization<br>GO:0006508 - proteolysis<br>GO:0009252 - peptidoglycan biosynthetic process<br>GO:0008360 - regulation of cell shape<br>GO:0043164 - Gram-negative-bacterium-type cell wall biogenesis<br>GO:0018104 - peptidoglycan-protein cross-linking |
| P87 E10 |   | x |  | <i>yohG</i> | GO:0006810 - transport<br>GO:0046677 - response to antibiotic                                                                                                                                                                                                                     |
| P87 E11 |   | x |  | <i>ygeO</i> | GO:0009405 - pathogenesis                                                                                                                                                                                                                                                         |
| P87 F8  |   | x |  | <i>emtA</i> | GO:0071555 - cell wall organization<br>GO:0000270 - peptidoglycan metabolic process<br>GO:0016998 - cell wall macromolecule catabolic process                                                                                                                                     |
| P87 G1  |   | x |  | <i>yieP</i> | GO:0006355 - regulation of transcription, DNA-templated<br>GO:0006351 - transcription, DNA-templated                                                                                                                                                                              |
| P87 G3  | x |   |  | <i>tnaB</i> | GO:0006865 - amino acid transport<br>GO:0006810 - transport<br>GO:0015801 - aromatic amino acid transport<br>GO:0003333 - amino acid transmembrane transport<br>GO:0006569 - tryptophan catabolic process                                                                         |
| P87 G4  | x |   |  | <i>ymfP</i> |                                                                                                                                                                                                                                                                                   |
| P87 G8  | x |   |  | <i>abgT</i> | GO:1902604 - p-aminobenzoyl-glutamate transmembrane transport<br>GO:0006865 - amino acid transport<br>GO:0006810 - transport<br>GO:0015814 - p-aminobenzoyl-glutamate transport                                                                                                   |
| P87 H5  |   | x |  | <i>nuoC</i> | GO:0055114 - oxidation-reduction process<br>GO:0008152 - metabolic process<br>GO:0006810 - transport                                                                                                                                                                              |
| P87 H9  |   | x |  | <i>yedQ</i> | GO:1902201 - negative regulation of bacterial-type flagellum-dependent cell motility<br>GO:0030244 - cellulose biosynthetic process                                                                                                                                               |
| P89 B4  |   | x |  | <i>ybbN</i> | GO:0055114 - oxidation-reduction process<br>GO:0061077 - chaperone-mediated protein folding<br>GO:0045454 - cell redox homeostasis<br>GO:0006662 - glycerol ether metabolic process                                                                                               |
| P89 B8  |   | x |  | <i>yibK</i> | GO:0032259 - methylation<br>GO:0030488 - tRNA methylation<br>GO:0008033 - tRNA processing<br>GO:0006396 - RNA processing<br>GO:0001510 - RNA methylation<br>GO:0002131 - wobble position cytosine ribose methylation<br>GO:0002132 - wobble position uridine ribose methylation   |
| P89 E8  |   | x |  | <i>yaaY</i> | GO:0006974 - cellular response to DNA damage stimulus                                                                                                                                                                                                                             |



|         |   |   |   |             |                                                                                                                                                                                                                                                                                                                                                                        |
|---------|---|---|---|-------------|------------------------------------------------------------------------------------------------------------------------------------------------------------------------------------------------------------------------------------------------------------------------------------------------------------------------------------------------------------------------|
| P89 E9  |   | x |   | <i>ygcW</i> | GO:0008152 - metabolic process<br>GO:0006974 - cellular response to DNA damage stimulus<br>GO:0055114 - oxidation-reduction process                                                                                                                                                                                                                                    |
| P89 E12 | x |   |   | <i>yfeH</i> |                                                                                                                                                                                                                                                                                                                                                                        |
| P89 G5  | x |   |   | <i>rpsT</i> | GO:0043086 - negative regulation of catalytic activity<br>GO:0006412 - translation                                                                                                                                                                                                                                                                                     |
| P89 G6  | x |   |   | <i>ybiM</i> | GO:0009242 - colanic acid biosynthetic process                                                                                                                                                                                                                                                                                                                         |
| P89 G9  |   | x |   | <i>rpsU</i> | GO:0006412 - translation                                                                                                                                                                                                                                                                                                                                               |
| P89 G10 |   | x |   | <i>yfeS</i> |                                                                                                                                                                                                                                                                                                                                                                        |
| P89 H5  |   | x |   | <i>marC</i> |                                                                                                                                                                                                                                                                                                                                                                        |
| P89 H6  |   | x |   | <i>dmsD</i> | GO:0061077 - chaperone-mediated protein folding                                                                                                                                                                                                                                                                                                                        |
| P89 H10 |   | x |   | <i>baeR</i> | GO:0006355 - regulation of transcription, DNA-templated<br>GO:0006351 - transcription, DNA-templated<br>GO:2001023 - regulation of response to drug<br>GO:2000144 - positive regulation of DNA-templated transcription, initiation<br>GO:0000160 - phosphorelay signal transduction system                                                                             |
| P89 H11 |   | x |   | <i>yeeP</i> | GO:0000027 - ribosomal large subunit assembly                                                                                                                                                                                                                                                                                                                          |
| P91 F1  |   | x |   | <i>ydfK</i> |                                                                                                                                                                                                                                                                                                                                                                        |
| P91 H2  |   |   | x | <i>ydjR</i> |                                                                                                                                                                                                                                                                                                                                                                        |
| P93 D1  | x |   |   | <i>ubiX</i> | GO:0051188 - cofactor biosynthetic process<br>GO:0009108 - coenzyme biosynthetic process<br>GO:0006744 - ubiquinone biosynthetic process                                                                                                                                                                                                                               |
| P93 D2  |   | x |   | <i>atpB</i> | GO:0015986 - ATP synthesis coupled proton transport<br>GO:0042777 - plasma membrane ATP synthesis coupled proton transport<br>GO:0015992 - proton transport<br>GO:0006811 - ion transport<br>GO:0006810 - transport<br>GO:0006754 - ATP biosynthetic process                                                                                                           |
| P93 G1  | x |   |   | <i>phnN</i> | GO:0046835 - carbohydrate phosphorylation<br>GO:0019634 - organic phosphonate metabolic process<br>GO:0006015 - 5-phosphoribose 1-diphosphate biosynthetic process<br>GO:0009435 - NAD biosynthetic process                                                                                                                                                            |
| P95 A1  |   | x |   | <i>ompR</i> | GO:0045893 - positive regulation of transcription, DNA-templated<br>GO:0006355 - regulation of transcription, DNA-templated<br>GO:0000160 - phosphorelay signal transduction system<br>GO:0006351 - transcription, DNA-templated                                                                                                                                       |
| P95 A2  |   | x |   | <i>secB</i> | GO:0051262 - protein tetramerization<br>GO:0043952 - protein transport by the Sec complex<br>GO:0015031 - protein transport<br>GO:0006605 - protein targeting<br>GO:0008104 - protein localization<br>GO:0061077 - chaperone-mediated protein folding<br>GO:0072321 - chaperone-mediated protein transport<br>GO:0006810 - transport<br>GO:0006457 - protein folding   |
| P95 A5  |   |   | x | <i>rbfA</i> | GO:0042254 - ribosome biogenesis<br>GO:0006364 - rRNA processing<br>GO:0006974 - cellular response to DNA damage stimulus<br>GO:0009409 - response to cold<br>GO:0030490 - maturation of SSU-rRNA                                                                                                                                                                      |
| P95 A6  |   |   | x | <i>ybeY</i> | GO:0006508 - proteolysis<br>GO:0042254 - ribosome biogenesis<br>GO:0031564 - transcription antitermination<br>GO:0000478 - endonucleolytic cleavage involved in rRNA processing<br>GO:0030490 - maturation of SSU-rRNA<br>GO:0006364 - rRNA processing<br>GO:0009408 - response to heat<br>GO:0042274 - ribosomal small subunit biogenesis<br>GO:0006412 - translation |
| P95 C3  |   |   | x | <i>rpmJ</i> | GO:0006412 - translation                                                                                                                                                                                                                                                                                                                                               |
| P95 D2  |   | x |   | <i>rnhA</i> | GO:0090305 - nucleic acid phosphodiester bond hydrolysis<br>GO:0090502 - RNA phosphodiester bond hydrolysis, endonucleolytic<br>GO:0006401 - RNA catabolic process<br>GO:0043137 - DNA replication, removal of RNA primer                                                                                                                                              |
| P95 D3  |   | x |   | <i>nusB</i> | GO:0006355 - regulation of transcription, DNA-templated<br>GO:0006353 - DNA-templated transcription, termination<br>GO:0006351 - transcription, DNA-templated                                                                                                                                                                                                          |

|        |   |   |   |             |                                                                                                                                                                                                                                                                                                                                                                                                                                                                                    |
|--------|---|---|---|-------------|------------------------------------------------------------------------------------------------------------------------------------------------------------------------------------------------------------------------------------------------------------------------------------------------------------------------------------------------------------------------------------------------------------------------------------------------------------------------------------|
| P95 D4 |   |   | x | <i>envC</i> | GO:0051345 - positive regulation of hydrolase activity<br>GO:0001896 - autolysis<br>GO:0009273 - peptidoglycan-based cell wall biogenesis<br>GO:0051301 - cell division<br>GO:0007049 - cell cycle<br>GO:0000920 - cell separation after cytokinesis<br>GO:0042493 - response to drug                                                                                                                                                                                              |
| P95 F1 | x |   |   | <i>yfgA</i> |                                                                                                                                                                                                                                                                                                                                                                                                                                                                                    |
| P95 F2 |   | x |   | <i>fdx</i>  | GO:0055114 - oxidation-reduction process<br>GO:0016226 - iron-sulfur cluster assembly                                                                                                                                                                                                                                                                                                                                                                                              |
| P95 F4 |   | x |   | <i>parC</i> | GO:0006268 - DNA unwinding involved in DNA replication<br>GO:0006259 - DNA metabolic process<br>GO:0030541 - plasmid partitioning<br>GO:0007062 - sister chromatid cohesion<br>GO:0007059 - chromosome segregation<br>GO:0006265 - DNA topological change                                                                                                                                                                                                                          |
| P95 G1 |   | x |   | <i>dnaK</i> | GO:1903506 - regulation of nucleic acid-templated transcription<br>GO:0006461 - protein complex assembly<br>GO:0043241 - protein complex disassembly<br>GO:0051085 - chaperone mediated protein folding requiring cofactor<br>GO:0070389 - chaperone cofactor-dependent protein refolding<br>GO:0034620 - cellular response to unfolded protein<br>GO:0006457 - protein folding<br>GO:0043335 - protein unfolding<br>GO:0009408 - response to heat<br>GO:0006260 - DNA replication |
| P95 G2 |   | x |   | <i>rluD</i> | GO:0009451 - RNA modification<br>GO:0006364 - rRNA processing<br>GO:0001522 - pseudouridine synthesis<br>GO:0000455 - enzyme-directed rRNA pseudouridine synthesis<br>GO:0000027 - ribosomal large subunit assembly                                                                                                                                                                                                                                                                |
| P95 G3 |   | x |   | <i>rfaE</i> | GO:0046835 - carbohydrate phosphorylation<br>GO:0009058 - biosynthetic process<br>GO:0097171 - ADP-L-glycero-beta-D-manno-heptose biosynthetic process<br>GO:0009244 - lipopolysaccharide core region biosynthetic process<br>GO:0016310 - phosphorylation<br>GO:0008152 - metabolic process<br>GO:0009103 - lipopolysaccharide biosynthetic process<br>GO:0005975 - carbohydrate metabolic process                                                                                |
